# Supplementary material for: Genetic Knockouts Indicate That the ABCC2 Protein in the Bollworm Helicoverpa zea Is Not a Major Receptor for the Cry1Ac Insecticidal Protein
Source: MDPI journal article supplement (doi:10.3390/genes12101522), 2021-09-28
Supplement: s1 [file s1]

107087

Hz\_ABCC2 GGAAGACCCGCCGGTCTGAAGGACTTAACTTTGAAATTCAAAGCGGCTGGAAGGTAAGAGACCTAATAATGTATTGGA

SPM-8 (1) GGAAGACCCGCCGGTCTGAAGGACTTAACTTTGAAATTCAAAGCGGCTGGAAGGTAAGAGACCTAATAATGTATTGGA

107167

Hz\_ABCC2 TTAATAATAAAGCAATAAAGATATACTTGCCGTGCTACCCTAAACTACCCGTGTTCCATGTATTATTCAGATAAAATCCA

SPM-8 (81) TTAATAATAAAGCAATAAAGATATACTTGCCGTGCTACCCTAAACTACCCGTGTTCCATGTATTATTCAGATAAAATCCA

107247

Hz\_ABCC2 TCCAAAGGTTGTCTAGAAGAAATCGCTGTTTGGCGATAAGACGGCCAATTATACCTGTTCTTTGTGTCTATGATTATCAA

SPM-8 (161) TCCAAAGGTTGTCTAGAAGAAATCGCTGTTTGGCGATAAGACGGCCAATTATACCTGTTCTTTGTGTCTATGATTATCAA

107327

Hz\_ABCC2 GATGATATGATGAGAAGATTTATAAAGAATAATCTATCTATGTATTGCTTACTTAATGTAATGAATGTTGTAGGTTGGA

SPM-8 (241) GATGATATGATGAGAAGATTTATAAAGAATAATCTATCTATGTATTGCTTACTTAATGTAATGAATGTTGTAGGTTGGA

107407

Hz\_ABCC2 GTTGTAGGCAGAACAGGAGCCGGCAAGTCATCGC **TCATCGC** GGCTTTGTTCGGCTTAGTGACATAAGCGGCAGCATCAA

SPM-8 (321) GTTGTAGGCAGAACAGGAGCCGGCAAGTCATCGC ----- GGCTTTGTTCGGCTTAGTGACATAAGCGGCAGCATCAA

107487

Hz\_ABCC2 AATTGACGGTGTGGACACCGAAGGATTAGCCAAAAAGGTATCGATGTTAAAAAATACATTCTTTCTAAAAGACTTAGTGA

SPM-8 (394) AATTGACGGTGTGGACACCGAAGGATTAGCCAAAAAGGTATCGATGTTAAAAAATACATTCTTTCTAAAAGACTTAGTGA

107567

Hz\_ABCC2 AGTATTATTTATTGTTTAGTTAAATTACTAATAGAAATTTGTGGATTTGTTGAAAATATATTAACGGCAGGCTCGTGGT

SPM-8 (473) AGTATTATTTATTGTTTAGTTAAATTACTAATAGAAATTTGTGGATTTGTTGAAAATATATTAACGGCAGGCTCGTGGT

107647

Hz\_ABCC2 TTCCAGCACCCGGATAAAAAATATCCTTTTATTGCAATTTTATTGCACTCTCTTTTATGAACCTCTCTATGTACTCACC

SPM-8 (553) TTCCAGCACCCGGATAAAAAATATCCTTTTATTGCAATTTTATTGCACTCTCTTTTATGAACCTCTCTATGTACTCACC

107727

Hz\_ABCC2 TTAAGTACTCTCTTATGTAAGATCTCATGTACTTCCCTTATGTACTCTCTTAC **GTACCCTCTTATGTGCTCTCTTATGTA**

SPM-8 (633) TTAAGTACTCTCTTATGTAAGATCTCATGTACTTCCCTTATGTACTCTCTTAT **GTACCCTCTTATGTGCTCTCTTATGTA**

107807

Hz\_ABCC2 CTCCCCTTATGTACTCCTCTCTGTACTCCTCTTATACAAAGTGTGTCGTACCTAATCACATGAAATTAAATACGTTGAT

SPM-8 (713) CTCCCCTTATGTACTCCTCTCTGTACTCCTCTTATACAAAGTGTGTCGTACCTAATCACATGAAATTAAATACGTTGAT

107887

Hz\_ABCC2 ATACTGGTTAATACATTTGTAGGAAAAGTAAGAGAATCTTATGTCGTCATTTTTTTTTTATT **TAGAACATTGATTACGCG**

SPM-8 (793) ATACTGGTTAATACATTTGTAGGAAAAGTAAGAGAATCTTATGTCGTCATTTTTTTTTTATT **AGAAAAATTGATTACGCG**

107967

Hz\_ABCC2 ATAACCTTTTACATTTCGACAGACTTTGAGATCGAAAAATCAATTATTCACACAAGAGCCGGTGTCTGTTCTCGGCTACTCTG

SPM-8 (872) ATAACCTTTTACATTTCGACAGACTTTGAGATCGAAAAATCAATTATTCACACAAGAGCCGGTGTCTGTTCTCGGCTACTCTG

108047

Hz\_ABCC2 CGATACAATTTGGACCCGTTTCGACGATTACAGCGACGACGATAT ----- TTGGAGGGCGTTGGAACAGGTACGCTTAAT

SPM-8 (952) CGATACAATTTGGACCCGTTTCGACGATTACAGCGACGACGATAT **GAAGGCG** TTGGAGGGCGTTGGAACAGGTACGCTTAAT

108121

Hz\_ABCC2 TAAATTACTTCTT **TAACAGACCCTCGGCACTCGAACTAATCTAACTAATGAATGAATCTATGATTTTAGGTGGAATTAAAA**

SPM-8 (1032) TAAATTACTTCTT **TAACAGACCCTCGGCACTCGAACTAATCTAACTAATGAATGAATCTATGATTTTAGGTGGAATTAAAA**

108201

Hz\_ABCC2 GAAGGAATACCGGCTTTAGACTTTAAGGTCGCTGAAGGTGGTACTAACTTCTCTATGGGACAACGTCAGTTGGTTTGCTT

SPM-8 (1112) GAAGGAATACCGGCTTTAGACTTTAAGGTCGCTGAAGGTGGTACTAACTTCTCTATGGGACAACGTCAGTTGGTTTGCTT

108281

Hz\_ABCC2 GGCTCGTGCCATTCTACGCTCTAACAAAATACTCATCATGGACGAAGCTACCG

SPM-8 (1192) GGCTCGTGCCATTCTACGCTCTAACAAAATACTCATCATGGACGAAGCTACCG

Figure S1. Alignment of *Helicoverpa zea* ATP binding cassette transporter subfamily C2 (ABCC2) genome sequence from 107,087 to 108334 bp and amplicon sequence from knockout line SPM-8 with 7 bp deletion at the exon 21 sgRNA target site and 6 bp net insertion at the exon 22 sgRNA target site. Identical nucleotides are shown in white text with black background and alignment gaps are indicated by hyphens. Deletions and insertions caused by CRISPR/Cas9 editing at sgRNA target sites are marked with red bold text and nucleotide polymorphisms between the reference genomic scaffold (Accession: KY701524) sequence and amplicon sequences are shown in dark gray text.

107089

Hz\_ABCC2 AAGACCCGCCGGTCTGAAGGACTTAACTTTGAAATTCAAAGCGGCTGGAAGGTAAGAGACCTAATAATGTATTGATT

```

SPM-16 (1) AAGACCCGCCGGTGCTGAAGGACTTAACTTTGAAATTCAAAGCGGCTGGAAGGTAAGAGACCTAATAATGTATTGATT
107169
Hz_ABCC2 AAAATAAAAGCAATAAAGATATACTTGCCGTGCTACCCCTAACTACCCGTGTTCCATGTATTATTCAGATAAAATCCATC
SPM-16 (81) AAAATAAAAGCAATAAAGATATACTTGCCGTGCTACCCCTAACTACCCGTGTTCCATGTATTATTCAGATAAAATCCATC
107249
Hz_ABCC2 CAAAGTTGTCTAGAAAGAAATCGCTGTTTGGCGATAAGACGGCCAATTATACTGTTCTTTGTGTGCATATGATTATCAAGA
SPM-16 (161) CAAAGTTGTCTAGAAAGAAATCGCTGTTTGGCGATAAGACGGCCAATTATACTGTTCTTTGTGTGCATATGATTATCAAGA
107329 11612
Hz_ABCC2 TGATATGATGAGAAGATTTATAAAGAATAATCTATCTATGTATTGCTTACTTAATGTAATGAATGTTGTAGGTTGGAGT
SPM-16 (241) TGATATGATGAGAAGATTTATAAAGAATAATCTATCTATGTATTGCTTACTTAATGTAATGAATGTTGTAGGTTGGAGT
107409
Hz_ABCC2 TGTAGGCAGAACAGGAGCCGGCAAGTCATCGCTCATCGCGGCTTTGTTCCGGCTTAGTGACATAAGCGGCAGCATCAAAA
SPM-16 (321) TGTAGGCAGAACAGGAGCCGGCAAGTCATC-----
107489
Hz_ABCC2 TTGACGGTGTGGACACCGAAGGATTAGCCAAAAAGGTATCGATGTTAAAAATACATTCTTTCTAAAAGACTTAGTGAAG
SPM-16 (351) -----
107569
Hz_ABCC2 TATTATTTATTGTTTAGTTAAATTACTAATAGAATTTGTGGATTTGTTGAAAATATATTAACGGCAGGAGCTCGTGGTTT
SPM-16 (351) -----
107649
Hz_ABCC2 CCAGACCCCGGATAAAAAATATCCTTTTTATTGCAATTTTATTGCACTCTCTTTTATGAACCTCTTATGTACTCACCTT
SPM-16 (351) -----
107729
Hz_ABCC2 AAGTACTCTCTTATGTAAGATCTCATGTACTTCCCTTATGTACTCTCTTACGTACCCTCTTATGTGCTCTCTTATGTACT
SPM-16 (351) -----
109809
Hz_ABCC2 CCCCTTATGTACTCCTCTTCTGTACTCCTCTTATACAAAGTGTGTCGTACCTAATCACATGAAATTAAATACGTTGATAT
SPM-16 (351) -----ACATGAAATTAAATACGTTGATAT
107889
Hz_ABCC2 ACTGGTTAATACATTTGTAGGAAAAGTAAGAGAATCTTATGTCGTCATTTTTTTTTTATTTAGAAACATTGATTACGCGAT
SPM-16 (375) ACTGGTTAATACATTTGTAGGAAAAGTAAGAGAATCTTATGTCGTCATTTTTTTTTTATTTAGAAACATTGATTACGCGAT
107969
Hz_ABCC2 AACTTTTTTACATTTCGCAGACTTTGAGATCGAAAATATCAATTATTCCACAAGAGCCGGTGCTGTTCTCGGCTACTCTGCG
SPM-16 (455) AACTTTTTTACATTTCGCAGACTTTGAGATCGAAAATATCAATTATTCCACAAGAGCCGGTGCTGTTCTCGGCTACTCTGCG
108045
Hz_ABCC2 ATACAATTTGGACCCGTTTCGACGATTACAGCGACGACGATATTT---GGAGGGCGTTGGAACAGGTACGCTTAATTAAA
SPM-16 (535) ATACAATTTGGACCCGTTTCGACGATTACAGCGACGACGATATTTATATGGAGGGCGTTGGAACAGGTACGCTTAATTAAA
108125
Hz_ABCC2 TTACTTCTCAACAGACCCTCGGCACTCGAACTAATCTAATAATGAATGAATCTATGATTTTAGGTGGAATTAAAAGAAG
SPM-16 (615) TTACTTCTCAACAGACCCTCGGCACTCGAACTAATCTAATAATGAATGAATCTATGATTTTAGGTGGAATTAAAAGAAG
108204
Hz_ABCC2 GAATACCGGCTTTAGACTTTAAGGTCGCTGAAGGTGGTACTAACTTCTCTATGGGACAACGTCAGTTGGTTTGCTTGGCT
SPM-16 (694) GAATACCGGCTTTAGACTTTAAGGTCGCTGAAGGTGGTACTAACTTCTCTATGGGACAACGTCAGTTGGTTTGCTTGGCT
108285
Hz_ABCC2 CGTGCCATTCTACGCTCTAACAAAATACTCATCATGGACGAAGCTACCG
SPM-16 (774) CGTGCCATTCTACGCTCTAACAAAATACTCATCATGGACGAAGCTACCG

```

Figure S2. Alignment of *Helicoverpa zea* ATP binding cassette transporter subfamily C2 (ABCC2) genome sequence from 107,089 to 108,333 bp and amplicon sequence from knockout line SPM-16 with a deletion of 426 bp and an insertion of four bp at the sgRNA target sites in exon 21 and 22, respectively. Identical nucleotides are shown in white text with black background and alignment gaps are indicated by hyphens. Deletions and insertions caused by CRISPR/Cas9 editing at sgRNA target sites are marked with red text and nucleotide polymorphisms between the reference genomic scaffold (Accession: KY701524) sequence and amplicon sequences, including those may have been introduced by repair enzymes are shown in dark gray text with white background.

```

Hz_ABCC2 (99062) TGAAGGCATTACGAAAGGCCTACTGGGTCTCCTACATGCCAGGAGCTATTTTTATCATCATTCATCTGCAGCCAGGTA

```

|                       |          |                                                                                    |
|-----------------------|----------|------------------------------------------------------------------------------------|
| WT                    | (57)     | TGGAAGGCATTACGAAAGGCCACTGGGTCTCCTACATGCCAGGAGCTATTTTTATCATCATTCATCTGCAGCCAGGTA     |
| SPM-A28C              | (1)      | TGGAAGGCATTACGAAAGGCCACTGGGTCTCCTACATGCCAGGAGCTATTTTTATCATCATTCATCTGCAGCCAGGTA     |
| H <sub>z</sub> _ABCC2 | (99142)  | CACACTTTGTAAAGTATTTTTATTTAGTTATTTACGGCCAGTTTCTTCATCAAACATAAAAGTCAAAGTAATGTCTAAAG   |
| WT                    | (137)    | CACACTTTGTAAAGTATTTTTATTTAGTTATTTACGGCCAGTTTCTTCATCAAACATAAAAGTCAAAGTAATGTCTAAAG   |
| SPM-A28C              | (81)     | CACACTTTGTAAAGTATTTTTATTTAGTTATTTACGGCCAGTTTCTTCATCAAACATAAAAGTCAAAGTAATGTCTAAAG   |
| H <sub>z</sub> _ABCC2 | (99222)  | TAAAAGTAATGGTCAAATTCGTTTTTCAAGGCTAGTGACAGCAAACTAATAGAAAAAATGAATTTGACCGTTACTTTT     |
| WT                    | (217)    | TAAAAGTAATGGTCAAATTCGTTTTTCAAGGCTAGTGACAGCAAACTAATAGAAAAAATGAATTTGACCGTTACTTTT     |
| SPM-A28C              | (161)    | TAAAAGTAATGGTCAAATTCGTTTTTCAAGGCTAGTGACAGCAAACTAATAGAAAAAATGAATTTGACCGTTACTTTT     |
| H <sub>z</sub> _ABCC2 | (99302)  | ACTTTAAACATTACTTTGATTTTTACTTTGGATTTTACTTTTGATGAAGAAATTAGCTGTTAATGTTTAAGTTTCCTTAA   |
| WT                    | (296)    | ACTTTAAACATTACTTTGATTTTTACTTTGATTTTACTTTTGATGAAGAAATTAGCTGTTAATGTTTAAGTTTCCTTAA    |
| SPM-A28C              | (241)    | ACTTTAAACATTACTTTGATTTTTACTTTGGATTTTACTTTTGATGAAGAAATTAGCTGTTAATGTTTAAGTTTCCTTAA   |
| H <sub>z</sub> _ABCC2 | (99382)  | AAGTTAGATATAGTTGATCTATCTTTTAAATTTGGTTTCTTGATGGATCTTTAATCTCTCTTCAAAAGGTGTACTCAA     |
| WT                    | (375)    | AAGTTAGATATAGTTGATCTATCTTTTAAATTTGGTTTCTTGATGGATCTTTAATCTCTCTTCAAAAGGTGTACTCAA     |
| SPM-A28C              | (321)    | AAGTTAGATATAGTTGATCTATCTTTTAAATTTGGTTTCTTGATGGATCTTTAATCTCTCTTCAAAAGGTGTACTCAA     |
| H <sub>z</sub> _ABCC2 | (99462)  | AACTCAATTTTTTATTAGCATTCCACGTGTTATACAGGTGGTCAAGGTATACTTGTGTGCTTCACAATGCAACACACTTG   |
| WT                    | (455)    | AACTCAATTTTTTATTAGCATTCCACGTGTTATACAGGTGGTCAAGGTATACTTGTGTGCTTCACAATGCAACACACTTG   |
| SPM-A28C              | (401)    | AACTCAATTTTTTATTAGCATTCCACGTGTTATACAGGTGGTCAAGGTATACTTGTGTGCTTCACAATGCAACACACTTG   |
| H <sub>z</sub> _ABCC2 | (99542)  | TGAAATCCCGTAAAGACGTATCGTGTTATTACTTATGAGTGATGATATATCAAATCAATACCTAGGGCTATTCCGTAACG   |
| WT                    | (535)    | TGAAATCCCGTAAAGACGTATCGTGTTATTACTTATGAGTGATGATATATCAAATCAATACCTAGGGCTATTCCGTAACG   |
| SPM-A28C              | (481)    | TGAAATCCCGTAAAGACGTATCGTGTTATTACTTATGAGTGATGATATATCAAATCAATACCTAGGGCTATTCCGTAACG   |
| H <sub>z</sub> _ABCC2 | (99622)  | GTTTCCGTAGAAATTAGATTTTTTTTTCGTCTCTAGAGCTTGATTAATTATAATCTTTTTATGTTTACAGGACGTATCAG   |
| WT                    | (615)    | GTTTCCGTAGAAATTAGATTTTTTTTTCGTCTCTAGAGCTTGATTAATTATAATCTTTTTATGTTTACAGGACGTATCAG   |
| SPM-A28C              | (561)    | GTTTCCGTAGAAATTAGATTTTTTTTTCGTCTCTAGAGCTTGATTAATTATAATCTTTTTATGTTTACAGGACGTATCAG   |
| H <sub>z</sub> _ABCC2 | (99702)  | CCGCTGTTGTTTTCTCAGTTACTGTCGTAAGTGGTGGGACAGTGAATGACTCAGCAAGACGCTGGCCTCTATGCTCT      |
| WT                    | (693)    | CCGCTGTTGTTTTCTCAGTTACTGTCGTAAGTGGTGGGACAGTGAATGACTCAGCAAGACGCTGGCCTCTATGCTCT      |
| SPM-A28C              | (639)    | CCGCTGTTGTTTTCTCAGTTACTGTCGTAAGTGGTGGGACAGTGAATGACTCAGCAAGACGCTGGCCTCTATGCTCT      |
| H <sub>z</sub> _ABCC2 | (99782)  | CGCCATGCTGGGACTGAACTTCGCTCTCCATGATGTGTGTCAGCACCACAACACACTGTTTGTGATGCGGTTCAAGTTAAAG |
| WT                    | (773)    | CGCCATGCTGGGACTGAACTTCGCTCTCCATGATGTGTGTCAGCACCACAACACACTGTTTGTGATGCGGTTCAAGTTAAAG |
| SPM-A28C              | (679)    | -----                                                                              |
| H <sub>z</sub> _ABCC2 | (99862)  | TCAAGGTTGCCTGTTCTTCGCTTTTGTATAGGAAGGTGAGCATACTTTTAAGTAGAATAATCTTCCATCGATGTAATTAA   |
| WT                    | (853)    | TCAAGGTTGCCTGTTCTTCGCTTTTGTATAGGAAGGTGAGCATACTTTTAAGTAGAATAATCTTCCATCGATGTAATTAA   |
| SPM-A28C              | (679)    | -----                                                                              |
| H <sub>z</sub> _ABCC2 | (99942)  | ACAGGGACAATTAGACCGAAGTTAGGGTGCTTACATAAAGAAACAGGTTTCCGGTACAGATAAACTTGTACGGGTAGGTA   |
| WT                    | (933)    | ACAGGGACAATTAGACCGAAGTTAGGGTGCTTACATAAAGAAACAGGTTTCCGGTACAGATAAACTTGTACGGGTAGGTA   |
| SPM-A28C              | (679)    | -----                                                                              |
| H <sub>z</sub> _ABCC2 | (100022) | CCGATCAGTGCAGGTATAATATTTCAATACAATCCTATTCACTCACTTATAAAGAAACAGGTTGTTTACCTGTTTCAACT   |
| WT                    | (1013)   | CCGATCAGTGCAGGTATAATATTTCAATACAATCCTATTCACTCACTTATAAAGAAACAGGTTGTTTACCTGTTTCAACT   |
| SPM-A28C              | (679)    | -----                                                                              |
| H <sub>z</sub> _ABCC2 | (100102) | TACCTGTTTCTTTTATAAGTGAGTGAATAGGATTGTATTGAAATATTATACCTGCACTGATCGGTACCTACCCGTACAGGT  |
| WT                    | (1093)   | TACCTGTTTCTTTTATAAGTGAGTGAATAGGATTGTATTGAAATATTATACCTGCACTGATCGGTACCTACCCGTACAGGT  |
| SPM-A28C              | (679)    | -----                                                                              |
| H <sub>z</sub> _ABCC2 | (100182) | TTGTCTGTACCGGTAACCTGTTTCTTTATGTAAACACCCTTAAGATCGTTAAATTAGTTTAAATCAACCTATCAGCATTTT  |
| WT                    | (1173)   | TTGTCTGTACCGGTAACCTGTTTCTTTATGTAAACACCCTTAAGATCGTTAAATTAGTTTAAATCAACCTATCAGCATTTT  |
| SPM-A28C              | (679)    | -----                                                                              |
| H <sub>z</sub> _ABCC2 | (100262) | TATAGACAATATTTTTTTTCAATAAAAATTGGCCAGATCTGCTTTAAAGAAGACGTTGACGTTGGCTTTAAAGAGAC      |
| WT                    | (1253)   | TATAGACAATATTTTTTTTCAATAAAAATTGGCCAGATCTGCTTTAAAGAAGACGTTGACGTTGGCTTTAAAGAGAC      |
| SPM-A28C              | (679)    | -----                                                                              |
| H <sub>z</sub> _ABCC2 | (100342) | TGATACTATTTTATTTATTTTGGATATCTTTATTTAGATATACCTACTTACTTCTTTTTTGAAGCTCGATAAAAATTTT    |
| WT                    | (1332)   | TGATACTATTTTATTTATTTTGGATATCTTTATTTAGATATACCTACTTACTTCTTTTTTGAAGCTCGATAAAAATTTT    |
| SPM-A28C              | (679)    | -----                                                                              |
| H <sub>z</sub> _ABCC2 | (100422) | TTTGTTCTAGTTGCTCCGCATGACCCAAGTGTCGGTGGGTGAGGTGGCAGGAGGAAAGCTGGTGAAGTTGCTGTCCAACG   |
| WT                    | (1411)   | TTTGTTCTAGTTGCTCCGCATGACCCAAGTGTCGGTGGGTGAGGTGGCAGGAGGAAAGCTGGTGAAGTTGCTGTCCAACG   |
| SPM-A28C              | (679)    | -----                                                                              |

Hz\_ABCC2 (100502) **ATATCACGAGGTTGCGACTACGCGTTCATGTTCCCTACATTACTTGTGGATCGTGCCTATCCAAGTGGCTGTTGTTTTGTAC**  
 WT (1491) **ATATCACGAGGTTGCGACTACGCGTTCATGTTCCCTACATTACTTGTGGATCGTGCCTATCCAAGTGGCTGTTGTTTTGTAT**  
 SPM-A28C (679) -----

Hz\_ABCC2 (100582) **TTCTTGTGGGAGGCTGCTGGCTTCGCACCCCTTCGTCGGTCTGTTTGGAGTCGTTATACTGATTTTACCAC TGCAAGGTAT**  
 WT (1571) **TTCTTGTGGGAGGCTGCTGGCTTCGCACCCCTTCGTCGGTCTGTTTGGAGTCGTTATACTGATTTTACCAC TGCAAGGTAT**  
 SPM-A28C (679) -----

Hz\_ABCC2 (100662) **GTCATATTAAACCTTTTTTCAATTTAATATTGTTTCCTTATGTATCCATGTTATTAATCGATGAACTTTTGGCTTTTAG**  
 WT (1651) **GTCATATTAAACCTTTTTTCAATTTAATATTGTTTCCTTATGTATCCATGTTATTAATCGATGAACTTTTGGCTTTTAG**  
 SPM-A28C (679) -----

Hz\_ABCC2 (100742) **CTGGCTTGACGAAACTCACAACGTGTGTAAGACGTGAGACGGCTAAGAGAACGGACAGGCGAATTAAACTAATGAGTGAA**  
 WT (1731) **CTGGCTTGACGAAACTCACAACGTGTGTAAGACGTGAGACGGCTAAGAGAACGGACAGGCGAATTAAACTAATGAGTGAA**  
 SPM-A28C (679) -----

Hz\_ABCC2 (100822) **ATTATTGGTGGTATTCAGGTAAAAAACTTTTCTTAATTTTTATATATTGACCTATTTAAATGATGACAAAAATTAAC**  
 WT (1811) **ATTATTGGTGGTATTCAGGTAAAAAACTTTTCTTAATTTTTATATATTGACCTATTTAAATGATGACAAAAATTAAC**  
 SPM-A28C (679) -----

Hz\_ABCC2 (100902) **TGTTTGGTCAATTCAGGTCATTAAAATGTACGCTTGGGAGAAACCCTTCCAGCTAGTTGTGAAGGCAGCTCGTGCCTTT**  
 WT (1891) **TGTTTGGTCAATTCAGGTCATTAAAATGTACGCTTGGGAGAAACCCTTCCAGCTAGTTGTGAAGGCAGCTCGTGCCTTT**  
 SPM-A28C (679) -----

Hz\_ABCC2 (100982) **GAAATGAGTGCCCTCAGGAAGTCCATCTTCATCAGGAGTACTTTCCTAGGGTTCATGTTGTTCACTGAGCGAAGCATCAT**  
 WT (1971) **GAAATGAGTGCCCTCAGGAAGTCCATCTTCATCAGGAGTACTTTCCTAGGGTTCATGTTGTTCACTGAGCGAAGCATCAT**  
 SPM-A28C (679) -----

Hz\_ABCC2 (101062) **GTTTGTACAGTGTTGACACTCGCTCTCACAGGCACTATGATTACTGCCACTACGGTAAGATTTACTTATTATAATAATT**  
 WT (2051) **GTTTGTACAGTGTTGACACTCGCTCTCACAGGCACTATGATTACTGCCACTACGGTAAGATTTACTTATTATAATAATT**  
 SPM-A28C (679) -----

Hz\_ABCC2 (101142) **AAATATAAGATATTTTGCCGACCGTTTCATTCCATATATATTAATGGTTTTTCGAAATATCGCATCAATCGATTTCATCATC**  
 WT (2131) **AAATATAAGATATTTTGCCGACCGTTTCATTCCATATATATTAATGGTTTTTCGAAATATCGCATCAATCGATTTCATCATC**  
 SPM-A28C (679) -----

Hz\_ABCC2 (101222) **GATTTCATTCAATTTGGGCAAATTACTACTTAACTAAGTTTGAACAATCGTTCCGATATATAATCTCGATATTATTTCA**  
 WT (2211) **GATTTCATTCAATTTGGGCAAATTACTACTTAACTAAGTTTGAACAATCGTTCCGATATATAATCTCGATATTATTTCA**  
 SPM-A28C (679) -----

Hz\_ABCC2 (101302) **CAGATATACCCATTTC AACAGTACTTCAGTATTATTTCAGTTTAAACGTAACACTGATCATTCCTATGGCAATCGCAAGTTA**  
 WT (2291) **CAGATATACCCATTTC AACAGTACTTCAGTATTATTTCAGTTTAAACGTAACACTGATCATTCCTATGGCAATCGCAAGTTA**  
 SPM-A28C (679) -----

Hz\_ABCC2 (101382) **TTCCGAGATGATGGTGTCCATAGAACGTATCCAGGGATTCCCTAGTTTGGGTAAATATTGTTTCTTTTAAGTTCAATAAA**  
 WT (2371) **TTCCGAGATGATGGTGTCCATAGAACGTATCCAGGGATTCCCTAGTTTGGGTAAATATTGTTTCTTTTAAGTTCAATAAA**  
 SPM-A28C (679) -----

Hz\_ABCC2 (101462) **ATTTACACACATTAGGTAGATTGGTATAAAGCGTACAGTGATAATAATACTGAGATTTGATATTTATGTTTTGTAAACAG**  
 WT (2451) **ATTTACACACATTAGGTAGATTGGTATAAAGCGTACAGTGATAATAATACTGAGATTTGATATTTATGTTTTGTAAACAG**  
 SPM-A28C (679) -----

Hz\_ABCC2 (101542) **ACGAGCGGTCCGACATGCAAGTGACTCCAAAAATTAATGGATCTAACAATAACACTTTGTTTAAATCCAAGAAGTCACCA**  
 WT (2531) **ACGAGCGGTCCGACATGCAAGTGACTCCAAAAATTAATGGATCTAACAATAACACTTTGTTTAAATCCAAGAAGTCACCA**  
 SPM-A28C (679) -----

Hz\_ABCC2 (101622) **CTTGAAGTAGGCATCGTGCCTAAGAAATACTCACCTAGTGAAGTTATGGCTGCAAAGGAGATGCAGGATGATCCTACCCA**  
 WT (2611) **CTTGAAGTAGGCATCGTGCCTAAGAAATACTCACCTAGTGAAGTTATGGCTGCAAAGGAGATGCAGGATGATCCTACCCA**  
 SPM-A28C (679) -----

Hz\_ABCC2 (101702) **GATGGACTATCCTATCAGGCTTAACAAAGTAAGCGCATCGTGGACCGGCAGCAATAGTTCTTCAGAAATGACACTTAAGA**  
 WT (2691) **GATGGACTATCCTATCAGGCTTAACAAAGTAAGCGCATCGTGGACCGGCAGCAATAGTTCTTCAGAAATGACACTTAAGA**  
 SPM-A28C (679) -----

Hz\_ABCC2 (101782) **ATATATCGTTACGTATTTCGTAAAGGAAAATTGTGTGCTATCATTGGTCCTGTGGGGTCCGGAAAGGTAATTTATTTTCATT**  
 WT (2771) **ATATATCGTTACGTATTTCGTAAAGGAAAATTGTGTGCTATCATTGGTCCTGTGGGGTCCGGAAAGGTAATTTATTTTCATT**  
 SPM-A28C (679) -----

Hz\_ABCC2 (101862) **ATAAATATTTGTTTCATATACAGATTTGTTTTTTTTATTTTTTACTTGTAATATTAATATTTTAACTTTTACAGACATCTC**  
 WT (2851) **ATAAATATTTGTTTCATATACAGATTTGTTTTTTTTATTTTTTACTTGTAATATTAATATTTTAACTTTTACAGACATCTC**  
 SPM-A28C (679) -----

Hz\_ABCC2(101942) **TACTGCAACTGCTCTTAAAAGAATTACCATTGAATAGTGGTACACTTGACGTGAGCGGGAAAATGTCGTACGCTTGTCAA**  
WT (2931) **TACTGCAACTGCTCTTAAAAGAATTACCATTGAATAGTGGTACACTTGACGTGAGCGGGAAAATGTCGTACGCTTGTCAA**  
SPM-A28C (679) -----

Hz\_ABCC2(102022) **GAGTCTGGCTGTTCCAGGCACAGTACGAGAAAACATTTTGTTTCGGCCTAACTTACGAACCCACAAAATACAAAGAGGT**  
WT (3011) **GAGTCTGGCTGTTCCAGGCACAGTACGAGAAAACATTTTGTTTCGGCCTAACTTACGAACCCACAAAATACAAAGAGGT**  
SPM-A28C (679) -----

Hz\_ABCC2(102102) **AAATTATTGCAGGTTATGAATGACTTTATTAAATTTTTATTTAGGTGCATAATTATAATAATAATGCGTTTATTTTCATGA**  
WT (3091) **AAATTATTGCAGGTTATGAATGACTTTATTAAATTTTTATTTAGGTGCATAATTATAATAATAATGCGTTTATTTTCATGA**  
SPM-A28C (679) -----

Hz\_ABCC2(102182) **CTACAATGGTCCAATTGTTAGTAACTTTTCAACTATAACTTATCGACTAAGGGTTAGTAATACCTAAAACTAAACGTTT**  
WT (3171) **CTACAATGGTCCAATTGTTAGTAACTTTTCAACTATAACTTATCGACTAAGGGTTAGTAATACCTAAAACTAAACGTTT**  
SPM-A28C (679) -----

Hz\_ABCC2(102262) **GCCTAACAAGCAAGTCCATCCAATGCCTAAGCACCAGGAGCATCATGCTTGTCGGCCAAGACTTGTAGGATGCTGTTGTAG**  
WT (3251) **GCCTAACAAGCAAGTCCATCCAATGCCTAAGCACCAGGAGCATCATGCTTGTCGGCCAAGACTTGTAGGATGCTGTTGTAG**  
SPM-A28C (679) -----

Hz\_ABCC2(102342) **GATGATGTAATTTATCTTCTATATAATTATATTAAATAATTAATTTATTATAAATAATTAAATTAATAATAATTAATAAT**  
WT (3331) **GATGATGTAATTTATCTTCTATATAATTATATTAAATAATTAATTTATTATAAATAATTAAATTAATAATAATTAATAAT**  
SPM-A28C (679) -----

Hz\_ABCC2(102422) **TATATAGAAGATATTTTTTTCTAACTAGCTGATCCCGTGAACCTTCGTATCGTTCAAACCTTCCCTGGACCTCTACAAACA**  
WT (3411) **TATATAGAAGATATTTTTTT-CTAACTAGCTGATCCCGTGAACCTTCGTATCGTTCAAACCTTCCCTGGACCTCTACAAACA**  
SPM-A28C (679) -----

Hz\_ABCC2(102502) **TTTTAAAACCAAATTAGCTCAATCGGCCAGCCGTCCTCGAGTTTTAATCAGACTAACGAACAATAATCCATTTTTATT**  
WT (3490) **TTTTAAAACCAAATTAGCTCAATCGGCCAGCCGTCCTCGAGTTTTAATCAGACTAACGAACAATAATCCATTTTTATT**  
SPM-A28C (679) -----

Hz\_ABCC2(102582) **TATATAGATTATATTTCTTGTGCGAATTATCTTATGTAGGTATGTCTTCCAAACATTTCATACTTACACCTGTATTTCTT**  
WT (3570) **TATATAGATTATATTTCTTGTGCGAATTATCTTATGTAGGTATGTCTTCCAAACATTTCATACTTACACCTGTATTTCTT**  
SPM-A28C (679) -----

Hz\_ABCC2(102662) **GCGATAGCTTTTAAGTTATATTCTTTCACCAAAATTAAAAATATGAAAAAGATATGATGTTCAACCACAAACAGAGATTGCA**  
WT (3650) **GCGATAGCTTTTAAGTTATATTCTTTCACCAAAATTAAAAATATGAAAAAGATATGATGTTCAACCACAAACAGAGATTGCA**  
SPM-A28C (679) -----

Hz\_ABCC2(102742) **CGAGAAACGTTAAAAATTTATAGTCAATTTTCCCGCTGTTTTATAATTCACCCAATTTTCATCTGCCATGGTCTGTTATG**  
WT (3730) **CGAGAAACGTTAAAAATTTATAGTCAATTTTCCCGCTGTTTTATAATTCACCCAATTTTCATCTGCCATGGTCTGTTATG**  
SPM-A28C (679) -----

Hz\_ABCC2(102822) **CATGTAGATATATTTTGTTATGGCAGGTTTGCAAGGTGTGTTTCGTTGCTGCCTGACTTCAAGCAGTTCCCGTATGGTGAC**  
WT (3810) **CATGTAGATATATTTTGTTATGGCAGGTTTGCAAGGTGTGTTTCGTTGCTGCCTGACTTCAAGCAGTTCCCGTATGGTGAC**  
SPM-A28C (679) -----

Hz\_ABCC2(102902) **CTGTCTTTAGTGGGAGAACGAGGAGTGTCCCTGTCAGGTGGTCAAAGAGCCAGGATCAATTTGGCTAGAGCAATTTATCG**  
WT (3890) **CTGTCTTTAGTGGGAGAACGAGGAGTGTCCCTGTCAGGTGGTCAAAGAGCCAGGATCAATTTGGCTAGAGCAATTTATCG**  
SPM-A28C (679) -----

Hz\_ABCC2(102982) **TGAGGTAAGCATCTTTCGTTTACGCAGAACTTCTACACATGGTAATAAAACACTTCAGTTGGTTATTTCGTGATTCGTAAA**  
WT (3970) **TGAGGTAAGCATCTTTCGTTTACGCAGAACTTCTACACATGGTAATAAAACACTTCAGTTGGTTATTTCGTGATTCGTAAA**  
SPM-A28C (679) -----

Hz\_ABCC2(103062) **TCGAGGTATTGATGAAGGACTATATTATGTTCTTGCGACTATTCCCTGTTATATGATATCGCAACCACAAGATTAATTGTC**  
WT (4050) **TCGAGGTATTGATGAAGGACTATATTATGTTCTTGCGACTATTCCCTGTTATATGATATCGCAACCACAAGATTAATTGTC**  
SPM-A28C (679) -----

Hz\_ABCC2(103142) **GGGGTAATACCTGATAACGTGAAAGTAAACAATTGGTAACAACCTTAGTTATATCGGCACTGTAATAATGCGACAGTATAT**  
WT (4130) **GGGGTAATACCTGATAACGTGAAAGTAAACAATTGGTAACAACCTTAGTTATATCGGCACTGTAATAATGCGACAGTATAT**  
SPM-A28C (679) -----

Hz\_ABCC2(103222) **GCGATACATAATTTGTTTACATTTAACTTTTCTAACAATTTATCAATGAAATCTTTTACATATTGATGAGAGCAACTTAT**  
WT (4210) **GCGATACATAATTTGTTTACATTTAACTTTTCTAACAATTTATCAATGAAATCTTTTACATATTGATGAGAGCAACTTAT**  
SPM-A28C (679) -----

Hz\_ABCC2(103302) **ACATTGTTGTCATTACACCACATTTTCTTAAATCGTGAGCGTGAAACTAAAATCGTGGGCGTATTTTCAGGCCGACATTT**  
WT (4290) **ACATTGTTGTCATTACACCACATTTTCTTAAATCGTGAGCGTGAAACTAAAATCGTGGGCGTATTTTCAGGCCGACATTT**

SPM-A28C (679) -----

H<sub>z</sub>\_ABCC2 (103382) **ACTTGCTGGATGATCCCCTATCTGCAGTGGACGCTAATGTAGGCAGACAAC**TGTTTGATGGCTGCATCAAAGGCTACCTC  
WT (4370) **ACTTGCTGGATGATCCCCTATCTGCAGTGGACGCTAATGTAGGCAGACAAC**TGTTTGATGGCTGCATCAAAGGCTACCTC  
SPM-A28C (679) -----

H<sub>z</sub>\_ABCC2 (103462) **ACTGGACGAACTTGCGTCTTGGTCACCCATCAGATCCATTACCTCAAAGCTGCTGATTTTATTGTAGTCCTTAATGAGGC**  
WT (4450) **ACTGGACGAACTTGCGTCTTGGTCACCCATCAGATCCATTACCTCAAAGCTGCTGATTTTATTGTAGTCCTTAATGAGGC**  
SPM-A28C (679) -----

H<sub>z</sub>\_ABCC2 (103542) **AAGTATGACTACCTATCATTTCATATTTCCATTGAAAGATAACAAAAGTATTTACATTAAAAATATATTTATTGAAGTGA**  
WT (4530) **AAGTATGACTACCTATCATTTCATATTTCCATTGAAAGATAACAAAAGTATTTACATTAAAAATATATTTATTGAAGTGA**  
SPM-A28C (679) -----

H<sub>z</sub>\_ABCC2 (103622) **TTAATTTTATCTTAACTATTATCTTTGGACGAGTCATTACAACGTAGCAAATTTCCAACACTTCAATATTTACTCTTTGA**  
WT (4610) **TTAATTTTATCTTAACTATTATCTTTGGACGAGTCATTACAACGTAGCAAATTTCCAACACTTCAATATTTACTCTTTGA**  
SPM-A28C (679) -----

H<sub>z</sub>\_ABCC2 (103702) **ATACTACTTACTTAGTCCAGCTTCAAAATTAATAAAAGTTTCCTAATGGTTTTTTATCAGGGTTCCGTCGAGAATATGGG**  
WT (4690) **ATACTACTTACTTAGTCCAGCTTCAAAATTAATAAAAGTTTCCTAATGGTTTTTTATCAGGGTTCCGTCGAGAATATGGG**  
SPM-A28C (679) -----

H<sub>z</sub>\_ABCC2 (103782) **CACTTATGATGAGCTGGTGAAGACAGGAAC**TGAATTCTCGATGCTGCTATCCAACCAAGAAAATGACGCAACTGAAAACG  
WT (4770) **CACTTATGATGAGCTGGTGAAGACAGGAAC**TGAATTCTCGATGCTGCTATCCAACCAAGAAAATGACGCAACTGAAAACG  
SPM-A28C (679) -----

H<sub>z</sub>\_ABCC2 (103862) **AAAAGAAAGTAAGTATGCACCTTAATATCTGGTATTTTCCGTGGCGACTTGAACGTTTGCCAGAAAACAGCTTTCAACATT**  
WT (4850) **AAAAGAAAGTAAGTATGCACCTTAATATCTGGTATTTTCCGTGGCGACTTGAACGTTTGCCAGAAAACAGCTTTCAACATT**  
SPM-A28C (679) -----

H<sub>z</sub>\_ABCC2 (103942) **ATCTTGTCTACATCGTTGCACATGTTCTCTAAACATATCCGAATAAAAAATATAGGTATGAACGAGTATACATCTACCTT**  
WT (4930) **ATCTTGTCTACATCGTTGCACATGTTCTCTAAACATATCCGAATAAAAAATATAGGTATGAACGAGTATACATCTACCTT**  
SPM-A28C (679) -----

H<sub>z</sub>\_ABCC2 (104022) **CGTGATTGTAATATGTACTGAATAAACATTGTTTCATTTTAAATTCTCCTAATAGATTATGCTTAAAAATGCAGCATAGA**  
WT (5010) **CGTGATTGTAATATGTACTGAATAAACATTGTTTCATTTTAAATTCTCCTAATAGATTATGCTTAAAAATGCAGCATAGA**  
SPM-A28C (679) -----

H<sub>z</sub>\_ABCC2 (104102) **TTTACACTGGACCTTGTTTCAAACAACCCAGAAAAAATACTATTTACGTTCCTTTCGTCTTAGGACCGACCAGCAATGATG**  
WT (5090) **TTTACACTGGACCTTGTTTCAAACAACCCAGAAAAAATACTATTTACGTTCCTTTCGTCTTAGGACCGACCAGCAATGATG**  
SPM-A28C (679) -----

H<sub>z</sub>\_ABCC2 (104182) **CGAGGAATATCAAAAATCTCAGTTAAGAGCGACACCGAAATGGAACAGAAGGCTCAAATACAGGAGGCAGAGGAGAGAGC**  
WT (5170) **CGAGGAATATCAAAAATCTCAGTTAAGAGCGACACCGAAATGGAACAGAAGGCTCAAATACAGGAGGCAGAGGAGAGAGC**  
SPM-A28C (679) -----

H<sub>z</sub>\_ABCC2 (104262) **GACAGGTAGCTTGAAGTTTGAGGTGGTGCTCAAGTACCTGAGCTCCGTCCAGTCTGGTGTCTGGTGTTCACGGCGTTCC**  
WT (5250) **GACAGGTAGCTTGAAGTTTGAGGTGGTGCTCAAGTACCTGAGCTCCGTCCAGTCTGGTGTCTGGTGTTCACGGCGTTCC**  
SPM-A28C (679) -----

H<sub>z</sub>\_ABCC2 (104342) **TTGTACTGCTGATCACGCAAGGTGCTGCCACCAGTG**CCGACTATTGGTTGAGTTTCTGGTAAGATAATGAATTATTTTTC  
WT (5330) **TTGTACTGCTGATCACGCAAGGTGCTGCCACCAGTG**CCGACTATTGGTTGAGTTTCTGGTAAGATAATGAATTATTTTTC  
SPM-A28C (679) -----CCGACTATTGGTTGAGTTTCTGGTAAGATAATGAATTATTTTTC

H<sub>z</sub>\_ABCC2 (104422) **AAAAATTTAATTTAACGGAACAAAGAACGTATTTTAAATTGGCTTCTCTGAATATGTCTTAAATGTCTCCTGATAGTTA**  
WT (5410) **AAAAATTTAATTTAACGGAACAAAGAACGTATTTTAAATTGGCTTCTCTGAATATGTCTTAAATGTCTCCTGATAGTTA**  
SPM-A28C (723) **AAAAATTTAATTTAACGGAACAAAGAACGTATTTTAAATTGGCTTCTCTGAATATGTCTTAAATGTCTCCTGATAGTTA**

H<sub>z</sub>\_ABCC2 (104502) **ACATTTTGATTGCAGGACTAACCAAGTGGATTCTTATGAACAATCTTTACCTGAAGGCGTGGATCCAGGTAAGTCTACGA**  
WT (5490) **ACATTTTGATTGCAGGACTAACCAAGTGGATTCTTATGAACAATCTTTACCTGAAGGCGTGGATCCAGGTAAGTCTACGA**  
SPM-A28C (803) **ACATTTTGATTGCAGGACTAACCAAGTGGATTCTTATGAACAATCTTTACCTGAAGGCGTGGATCCAGGTAAGTCTACGA**

H<sub>z</sub>\_ABCC2 (104582) **AATATCTCTGTTTTATTTATATGAACCTCCTGCGTATGTACCATTTCAGTTCTAAGATCTCAACCTCAACTAAAAAGTT**  
WT (5570) **AATATCTCTGTTTTATTTATATGAACCTCCTGCGTATGTACCATTTCAGTTCTAAGATCTCAACCTCAACTAAAAAGTT**  
SPM-A28C (883) **AATATCTCTGTTTTATTTATATGAACCTCCTGCGTATGTACCATTTCAGTTCTAAGATCTCAACCTCAACTAAAAAGTT**

H<sub>z</sub>\_ABCC2 (104662) **ATTTCTTTTCAGATACTGACATGAACGCACAAATTGGCTTACTTACAACCTGCCAGTACCTATACGTTTTTCGGTGGAGTT**  
WT (5650) **ATTTCTTTTCAGATACTGACATGAACGCACAAATTGGCTTACTTACAACCTGCCAGTACCTATACGTTTTTCGGTGGAGTT**  
SPM-A28C (963) **ATTTCTTTTCAGATACTGACATGAACGCACAAATTGGCTTACTTACAACCTGCCAGTACCTATACGTTTTTCGGTGGAGTT**

H<sub>z</sub>\_ABCC2 (104742) **ATATTGGCTTTAATAGTCATGACCCTCGTCAGAAATCACAGCTTTCGTAGCGATGACAATGCGAGCTTCTCAAAATCTTCA**

|                       |          |                                                                                   |
|-----------------------|----------|-----------------------------------------------------------------------------------|
| WT                    | (5730)   | ATATTGGCTTTAATAGTCATGACCCTCGTCAGAATCACAGCTTTCGTAGCGATGACAATGCGAGCTTCTCAAAATCTTCA  |
| SPM-A28C              | (1043)   | ATATTGGCTTTAATAGTCATGACCCTCGTCAGAATCACAGCTTTCGTAGCGATGACAATGCGAGCTTCTCAAAATCTTCA  |
| H <sub>z</sub> _ABCC2 | (104822) | CAACACTATTTACGAAAAATTAATTGTGACAGTAATGAGATTTTTCGATACCAATCCTTCTGGTGAGTAACATTCATCAT  |
| WT                    | (5810)   | CAACACTATTTACGAAAAATTAATTGTGACAGTAATGAGATTTTTCGATACCAATCCTTCTGGTGAGTAACATTCATCAT  |
| SPM-A28C              | (1123)   | CAACACTATTTACGAAAAATTAATTGTGACAGTAATGAGATTTTTCGATACCAATCCTTCTGGTGAGTAACATTCATCAT  |
| H <sub>z</sub> _ABCC2 | (104902) | TACACATAACATTATTTATTTAAGTGATCACATAAAAAAGTGCCATAGCATTTTGCGAGACAGTCAGTTAGATAAGTAGA  |
| WT                    | (5890)   | TACACATAACATTATTTATTTAAGTGATCACATAAAAAAGTGCCATAGCATTTTGCGAGACAGTCAGTTAGATAAGTAGA  |
| SPM-A28C              | (1203)   | TACACATAACATTATTTATTTAAGTGATCACATAAAAAAGTGCCATAGCATTTTGCGAGACAGTCAGTTAGATAAGTAGA  |
| H <sub>z</sub> _ABCC2 | (104982) | GATAATGATTTTAAATCAAAGTAACGGACTCTCTCAATGTTAGAAGTGATAGTAATTAGCGATAATTGCAGCTGGCCAA   |
| WT                    | (5970)   | GATAATGATTTTAAATCAAAGTAACGGACTCTCTCAATGTTAGAAGTGATAGTAATTAGCGATAATTGCAGCTGGCCAA   |
| SPM-A28C              | (1283)   | GATAATGATTTTAAATCAAAGTAACGGACTCTCTCAATGTTAGAAGTGATAGTAATTAGCGATAATTGCAGCTGGCCAA   |
| H <sub>z</sub> _ABCC2 | (105062) | GTGCCCAGGTTGCCGTGAGTAGACCTTAACATTAGTACACGCCAATTGCAACGACGGTAGCCAAGATAGCTTGGATAATA  |
| WT                    | (6050)   | GTGCCCAGGTTGCCGTGAGTAGACCTTAACATTAGTACACGCCAATTGCAACGACGGTAGCCAAGATAGCTTGGATAATA  |
| SPM-A28C              | (1363)   | GTGCCCAGGTTGCCGTGAGTAGACCTTAACATTAGTACACGCCAATTGCAACGACGGTAGCCAAGATAGCTTGGATAATA  |
| H <sub>z</sub> _ABCC2 | (105142) | ACAACATCTTTAATGAGTTCTGCAACTTTCGACTTGTGATTTTGGTGGCAGTAGATTTAAGAAAACGTTGTACATATGTG  |
| WT                    | (6130)   | ACAACATCTTTAATGAGTTCTGCAACTTTCGACTTGTGATTTTGGTGGCAGTAGATTTAAGAAAACGTTGTACATATGTG  |
| SPM-A28C              | (1443)   | ACAACATCTTTAATGAGTTCTGCAACTTTCGACTTGTGATTTTGGTGGCAGTAGATTTAAGAAAACGTTGTACATATGTG  |
| H <sub>z</sub> _ABCC2 | (105222) | TAGTATAAGATGATGATACATTCTAGGCTATCCGTATTTTTTTAGATTATGATTTATTAATGCAAGAAGATGATGCAAT   |
| WT                    | (6210)   | TAGTATAAGATGATGATACATTCTAGGCTATCCGTATTTTTTTAGATTATGATTTATTAATGCAAGAAGATGATGCAAT   |
| SPM-A28C              | (1523)   | TAGTATAAGATGATGATACATTCTAGGCTATCCGTATTTTTTTAGATTATGATTTATTAATGCAAGAAGATGATGCAAT   |
| H <sub>z</sub> _ABCC2 | (105302) | GAAATTAATTTACAACATCATGCTTATTGGAGCTTCTTTTGAATTTTCGCAGGTCGTGTGCTGAACAGATTCTCAAAAGAC |
| WT                    | (6290)   | GAAATTAATTTACAACATCATGCTTATTGGAGCTTCTTTTGAATTTTCGCAGGTCGTGTGCTGAACAGATTCTCAAAAGAC |
| SPM-A28C              | (1603)   | GAAATTAATTTACAACATCATGCTTATTGGAGCTTCTTTTGAATTTTCGCAGGTCGTGTGCTGAACAGATTCTCAAAAGAC |
| H <sub>z</sub> _ABCC2 | (105382) | ATGGGTGCCATGGATGAGCTTCTTCTCGCAGTCTTTTAGAAACAGTTCAGATGTATTTGTCGCTGACCAGTGTGTTGGT   |
| WT                    | (6370)   | ATGGGTGCCATGGATGAGCTTCTTCTCGCAGTCTTTTAGAAACAGTTCAGATGTATTTGTCGCTGACCAGTGTGTTGGT   |
| SPM-A28C              | (1683)   | ATGGGTGCCATGGATGAGCTTCTTCTCGCAGTCTTTTAGAAACAGTTCAGATGTATTTGTCGCTGACCAGTGTGTTGGT   |
| H <sub>z</sub> _ABCC2 | (105462) | GCTGAACGCCACTGCATTGCCCTGGACGCTTATACCTACCTCCGTGTTGATTGTCATCTTCGTGCTCATGTTGAGATGGT  |
| WT                    | (6450)   | GCTGAACGCCACTGCATTGCCCTGGACGCTTATACCTACCTCCGTGTTGATTGTCATCTTCGTGCTCATGTTGAGATGGT  |
| SPM-A28C              | (1763)   | GCTGAACGCCACTGCATTGCCCTGGACGCTTATACCTACCTCCGTGTTGATTGTCATCTTCGTGCTCATGTTGAGATGGT  |
| H <sub>z</sub> _ABCC2 | (105542) | ACCTGAATACAGCTCAGGCTGTCAAACGTTTGGAGGGCACAAGTAAGTGTTACATGAACCATAGGCGTTATTTAAGAACA  |
| WT                    | (6530)   | ACCTGAATACAGCTCAGGCTGTCAAACGTTTGGAGGGCACAAGTAAGTGTTACATGAACCATAGGCGTTATTTAAGAACA  |
| SPM-A28C              | (1843)   | ACCTGAATACAGCTCAGGCTGTCAAACGTTTGGAGGGCACAAGTAAGTGTTACATGAACCATAGGCGTTATTTAAGAACA  |
| H <sub>z</sub> _ABCC2 | (105622) | AATATTGATTTAGAGTGTAATTAATTAACGGTTAGAACATCGCTAATAGTTTGGACTGCCTCGTTGGTCTAGAGGTCGC   |
| WT                    | (6610)   | AATATTGATTTAGAGTGTAATTAATTAACGGTTAGAACATCGCTAATAGTTTGGACTGCCTCGTTGGTCTAGAGGTCGC   |
| SPM-A28C              | (1923)   | AATATTGATTTAGAGTGTAATTAATTAACGGTTAGAACATCGCTAATAGTTTGGACTGCCTCGTTGGTCTAGAGGTCGC   |
| H <sub>z</sub> _ABCC2 | (105702) | AAGCGGGCTGCTGTGCTCGAGGTCTCGGGTTCGATTCCCGGGTCAGGCCGAAATCGCTTTGTGGGTTTTTCATAAACTTT  |
| WT                    | (6690)   | AAGCGGGCTGCTGTGCTCGAGGTCTCGGGTTCGATTCCCGGGTCAGGCCGAAATCGCTTTGTGGGTTTTTCATAAACTTT  |
| SPM-A28C              | (2003)   | AAGCGGGCTGCTGTGCTCGAGGTCTCGGGTTCGATTCCCGGGTCAGGCCGAAATCGCTTTGTGGGTTTTTCATAAACTTT  |
| H <sub>z</sub> _ABCC2 | (105782) | CACAAAGCAGCCCGTAGCCTGGAAGTTGGTGATTGATTACCCCGTGCATCGGAGAGCACGTAATGTGGTCTCGCCCT     |
| WT                    | (6770)   | CACAAAGCAGCCCGTAGCCTGGAAGTTGGTGATTGATTACCCCGTGCATCGGAGAGCACGTAATGTGGTCTCGCCCT     |
| SPM-A28C              | (2083)   | CACAAAGCAGCCCGTAGCCTGGAAGTTGGTGATTGATTACCCCGTGCATCGGAGAGCACGTAATGTGGTCTCGCCCT     |
| H <sub>z</sub> _ABCC2 | (105862) | GATCTCTTTCCGGTCGTGTGCGATTGCCGTCCCATCGGGTTATGAGAGTGAAGGAATAGGGAGTGCACCTGTGTCTGCGC  |
| WT                    | (6850)   | GATCTCTTTCCGGTCGTGTGCGATTGCCGTCCCATCGGGTTATGAGAGTGAAGGAATAGGGAGTGCACCTGTGTCTGCGC  |
| SPM-A28C              | (2163)   | GATCTCTTTCCGGTCGTGTGCGATTGCCGTCCCATCGGGTTATGAGAGTGAAGGAATAGGGAGTGCACCTGTGTCTGCGC  |
| H <sub>z</sub> _ABCC2 | (105942) | AAATGCTCGTGCACTATAATATGTCTGCGCAGCTGGCTGATCTCCTTTAATGAGAACAGCCGCGTGGCCGAAATCGGC    |
| WT                    | (6930)   | AAATGCTCGTGCACTATAATATGTCTGCGCAGCTGGCTGATCTCCTTTAATGAGAACAGCCGCGTGGCCGAAATCGGC    |
| SPM-A28C              | (2243)   | AAATGCTCGTGCACTATAATATGTCTGCGCAGCTGGCTGATCTCCTTTAATGAGAACAGCCGCGTGGCCGAAATCGGC    |
| H <sub>z</sub> _ABCC2 | (106022) | CGTGGACGCCATTATTAATAGTTTTGAAATAAAATTATTTTAATTTTGTGTTTTATTCTACTTACAGCCAAGAGTCCTGTA |
| WT                    | (7010)   | CGTGGACGCCATTATTAATAGTTTTGAAATAAAATTATTTTAATTTTGTGTTTTATTCTACTTACAGCCAAGAGTCCTGTA |
| SPM-A28C              | (2323)   | CGTGGACGCCATTATTAATAGTTTTGAAATAAAATTATTTTAATTTTGTGTTTTATTCTACTTACAGCCAAGAGTCCTGTA |
| H <sub>z</sub> _ABCC2 | (106102) | TTTGAATGATTAACTCCACTATTTCTGGACTCTCCACTATTAGAAGTTCGGGTTCAGGATAGACAGATGAAATTGTT     |
| WT                    | (7090)   | TTTGAATGATTAACTCCACTATTTCTGGACTCTCCACTATTAGAAGTTCGGGTTCAGGATAGACAGATGAAATTGTT     |
| SPM-A28C              | (2403)   | TTTGAATGATTAACTCCACTATTTCTGGACTCTCCACTATTAGAAGTTCGGGTTCAGGATAGACAGATGAAATTGTT     |

Hz\_ABCC2 (106182) TGACGAAGCGCAGGTAAACATGAAGCTTATTATTTTTTTATATTAATTAAAATTACATCTAAAAAGATTTATCCAATAGT  
 WT (7170) TGACGAAGCGCAGGTAAACATGAAGCTTATTATTTTTTTATATTAATTAAAATTACATCTAAAAAGATTTATCCAATAGT  
 SPM-A28C (2483) TGACGAAGCGCAGGTAAACATGAAGCTTATTATTTTTTTATATTAATTAAAATTACATCTAAAAAGATTTATCCAATAGT

Hz\_ABCC2 (106262) AATGGTTATATATTTCTTATTGCTGTTTACAGAATCTCCACACAAGTGCTTTCCACACATTCTTCGGCGGTTCTACGGCA  
 WT (7250) AATGGTTATATATTTCTTATTGCTGTTTACAGAATCTCCACACAAGTGCTTTCCACACATTCTTCGGCGGTTCTACGGCA  
 SPM-A28C (2563) AATGGTTATATATTTCTTATTGCTGTTTACAGAATCTCCACACAAGTGCTTTCCACACATTCTTCGGCGGTTCTACGGCA

Hz\_ABCC2 (106342) TTTGCATTGTATCTCGATACTTTGTGTTTGACCTACCTCGGTGTCGTCATGTCAATTTTCATTTTGGGCGACTTTGGTGA  
 WT (7330) TTTGCATTGTATCTCGATACTTTGTGTTTGACCTACCTCGGTGTCGTCATGTCAATTTTCATTTTGGGCGACTTTGGTGA  
 SPM-A28C (2643) TTTGCATTGTATCTCGATACTTTGTGTTTGACCTACCTCGGTGTCGTCATGTCAATTTTCATTTTGGGCGACTTTGGTGA

Hz\_ABCC2 (106422) GCACTTTTTCTTAGGCACATTAAGGCAATATTTACACATTTCAGTTCATAGTGTGATATCTTTGGCATTACCATTCC  
 WT (7410) GCACTTTTTCTTAGGCACATTAAGGCAATATTTACACATTTCAGTTCATAGTGTGATATCTTTGGCATTACCATTCC  
 SPM-A28C (2723) GCACTTTTTCTTAGGCACATTAAGGCAATATTTACACATTTCAGTTCATAGTGTGATATCTTTGGCATTACCATTCC

Hz\_ABCC2 (106502) ATGTTGATAGAACAGAATTTGCTTATTTTTGTTTTTTTTTTTTCTTCCCAGGTGATTTGATCCCAGGTGGGAAGTGTCGGTCT  
 WT (7490) ATGTTGATAGAACAGAATTTGCTTATTTTTGTTTTTTTTCTTCCCAGGTGATTTGATCCCAGGTGGGAAGTGTCGGTCT  
 SPM-A28C (2803) ATGTTGATAGAACAGAATTTGCTTATTTTTGTTTTTTTTTTCTTCCCAGGTGATTTGATCCCAGGTGGGAAGTGTCGGTCT

Hz\_ABCC2 (106582) TGGCTGTCAGTCAGTCCATGGTGCTGACCATGATGTTGCAGATGGCAGCTAGGTTTCACAGCTGACTTTTTGGGGCAAATG  
 WT (7566) TGGCTGTCAGTCAGTCCATGGTGCTGACCATGATGTTGCAGATGGCAGCTAGGTTTCACAGCTGACTTTTTGGGGCAAATG  
 SPM-A28C (2881) TGGCTGTCAGTCAGTCCATGGTGCTGACCATGATGTTGCAGATGGCAGCTAGGTTTCACAGCTGACTTTTTGGGGCAAATG

Hz\_ABCC2 (106662) ACGGCTGTGGAGAGAGTTCTGGAATACACCAAGCTACCCACGGAGACCAATATGGAGCAAGGACGTAAGTACAATCATTC  
 WT (7646) ACGGCTGTGGAGAGAGTTCTGGAATACACCAAGCTACCCACGGAGACCAATATGGAGCAAGGACGTAAGTACAATCATTC  
 SPM-A28C (2961) ACGGCTGTGGAGAGAGTTCTGGAATACACCAAGCTACCCACGGAGACCAATATGGAGCAAGGACGTAAGTACAATCATTC

Hz\_ABCC2 (106742) GTTTTGAGATAGTTAGGTAATCTGACTTTGATTATTAAGTCCTTATCTGTCTAGCCTTTTTCCAACATATGTTCCGTACTT  
 WT (7726) GTTTTGAGATAGTTAGGTAATCTGACTTTGATTATTAAGTCCTTATCTGTCTAGCCTTTTTCCAACATATGTTCCGTACTT  
 SPM-A28C (3041) GTTTTGAGATAGTTAGGTAATCTGACTTTGATTATTAAGTCCTTATCTGTCTAGCCTTTTTCCAACATATGTTCCGTACTT

Hz\_ABCC2 (106822) CTTCCAGTCTATGTGATTGGATGCAGTAATGAAAACAGTTTTTTACATAGGCGACTGCCTATCTGAACTTCTAAATCTAG  
 WT (7806) CTTCCAGTCTATGTGATTGGATGCAGTAATGAAAACAGTTTTTTACATAGGCGACTGCCTATCTGAACTTCTAAATCTAG  
 SPM-A28C (3121) CTTCCAGTCTATGTGATTGGATGCAGTAATGAAAACAGTTTTTTACATAGGCGACTGCCTATCTGAACTTCTAAATCTAG

Hz\_ABCC2 (106902) TTACCGGGTAACCCGATATCCCTTTGGTTGTCAAATTTTGGCTCTGGCTTCTGACTACCGGCCAACCAAAACAAGGACG  
 WT (7886) TTACCGGGTAACCCGATATCCCTTTGGTTGTCAAATTTTGGCTCTGGCTTCTGACTACCGGCCAACCAAAACAAGGACG  
 SPM-A28C (3201) TTACCGGGTAACCCGATATCCCTTTGGTTGTCAAATTTTGGCTCTGGCTTCTGACTACCGGCCAACCAAAACAAGGACG

Hz\_ABCC2 (106982) ATAAGTTATAACATAGATATATTGATTTTCAGCAACTAACCCACCAAGGAATGGCCAGTGCTGGTAGAGTGACGTTCT  
 WT (7965) ATAAGTTATAACATAGATATATTGATTTTCAGCAACTAACCCACCAAGGAATGGCCAGTGCTGGTAGAGTGACGTTCT  
 SPM-A28C (3281) ATAAGTTATAACATAGATATATTGATTTTCAGCAACTAACCCACCAAGGAATGGCCAGTGCTGGTAGAGTGACGTTCT

Hz\_ABCC2 (107062) CAAATGTGTACCTGAATTATTCCATGGAAGACCCGCCGGTGCTGAAGGACTTAACTTTGAAATTCAAAGCGGCTGGAAG  
 WT (8045) CAAATGTGTACCTGAATTATTCCATGGAAGACCCGCCGGTGCTGAAGGACTTAACTTTGAAATTCAAAGCGGCTGGAAG  
 SPM-A28C (3361) CAAATGTGTACCTGAATTATTCCATGGAAGACCCGCCGGTGCTGAAGGACTTAACTTTGAAATTCAAAGCGGCTGGAAG

Hz\_ABCC2 (107142) GTAAGAGACCTAATAATGTATTTGATTAAAAATAAAGCAATAAAGATATACTTGCCGTGCTACCTAACTACCCGTGTT  
 WT (8125) GTAAGAGACCTAATAATGTATTTGATTAAAAATAAAGCAATAAAGATATACTTGCCGTGCTACCTAACTACCCGTGTT  
 SPM-A28C (3441) GTAAGAGACCTAATAATGTATTTGATTAAAAATAAAGCAATAAAGATATACTTGCCGTGCTACCTAACTACCCGTGTT

Hz\_ABCC2 (107222) CCATGTATTATTTCAGATAAATTCCATCCAAAGGTTGTCTAGAAGAAATCGCTGTTTGGCGATAAGACGGCCAATTATACT  
 WT (8205) CCATGTATTATTTCAGATAAATTCCATCCAAAGGTTGTCTAGAAGAAATCGCTGTTTGGCGATAAGACGGCCAATTATACT  
 SPM-A28C (3521) CCATGTATTATTTCAGATAAATTCCATCCAAAGGTTGTCTAGAAGAAATCGCTGTTTGGCGATAAGACGGCCAATTATACT

Hz\_ABCC2 (107302) GTTCTTTGTGTCATATGATTATCAAGATGATATGATGAGAAGATTTATAAAGAATAATCTATCTATGTATTTGCTTACTT  
 WT (8285) GTTCTTTGTGTCATATGATTATCAAGATGATATGATGAGAAGATTTATAAAGAATAATCTATCTATGTATTTGCTTACTT  
 SPM-A28C (3601) GTTCTTTGTGTCATATGATTATCAAGATGATATGATGAGAAGATTTATAAAGAATAATCTATCTATGTATTTGCTTACTT

Hz\_ABCC2 (107382) AATGTAATGAATGTTGTAGGTTGGAGTTGTAGGCAGAACAGGAGCCGGCAAGTCATCGCTCA-----  
 WT (8365) AATGTAATGAATGTTGTAGGTTGGAGTTGTAGGCAGAACAGGAGCCGGCAAGTCATCGCTCA-----  
 SPM-A28C (3681) AATGTAATGAATGTTGTAGGTTGGAGTTGTAGGCAGAACAGGAGCCGGCAAGTCATCGCTCA**CGGCTTTGTTCTCTTTGT**

Hz\_ABCC2 (107444) --TCGCGGCTTTGTTCCGGCTTAGTGACATAAGCGGCAGCATCAAATTGACGGTGTTGGACACCGAAGGATTAGCCAAAA  
 WT (8427) --TCGCGGCTTTGTTCCGGCTTAGTGACATAAGCGGCAGCATCAAATTGACGGTGTTGGACACCGAAGGATTAGCCAAAA  
 SPM-A28C (3761) **TC**TCGCGGCTTTGTTCCGGCTTAGTGACATAAGCGGCAGCATCAAATTGACGGTGTTGGACACCGAAGGATTAGCCAAAA

Hz\_ABCC2 (107522) AGGTATCGATGTTAAAAAATACATTCTTTCTAAAAGACTTAGTGAAGTATTATTTATTGTTTAGTTAAATTACTAATAGA  
 WT (8505) AGGTATCGATGTTAAAAAATACATTCTTTCTAAAAGACTTAGTGAAGTATTATTTATTGTTTAGTTAAATTACTAATAGA  
 SPM-A28C (3841) AGGTATCGATGTTAAAAAATACATTCTTTCTAAAAGACTTAGTGAAGTATTATTTATTGTTTAGTTAAATTACTAATAGA



Hz\_ABCC2 (107602) ATTTGTGGATTTGTTGAAAATATATTAACGGCACGAGCTCGTGGTTTCCAGCACCCGGATAAAAAATATCCTTTTTATTGCG  
 WT (8585) ATTTGTGGATTTGTTGAAAATATATTAACGGCACGAGCTCGTGGTTTCCAGCACCCGGATAAAAAATATCCTTTTTATTGCG  
 SPM-A28C (3921) ATTTGTGGATTTGTTGAAAATATATTAACGGCACGAGCTCGTGGTTTCCAGCACCCGGATAAAAAATATCCTTTTTATTGCG

Hz\_ABCC2 (107682) AATTTTATTTGCACTCTCTTTTATGAACCTCTCTTATGTACTCACCTTAAGTACTCTCTTATGTAAGATCTCATGTACTTC  
 WT (8665) AATTTTATTTGCACTCTCTTTTATGAACCTCTCTTATGTACTCACCTTAAGTACTCTCTTATGTAAGATCTCATGTACTTC  
 SPM-A28C (4001) AATTTTATTTGCACTCTCTTTTATGAACCTCTCTTATGTACTCACCTTAAGTACTCTCTTATGTAAGATCTCATGTACTTC

Hz\_ABCC2 (107762) CCTTATGTACTCTCTTATGTACCCTCTTATGTGCTCTCTTATGTACTCCCTTATGTACTCCTCTTCTGTACTCCTCTTA  
 WT (8745) C---TATGTACTCTCTTATGTACCCTCTTATGTGCTCTCTTATGTACTCCCTTATGTACTCCTCTTCTGTACTCCTCTTA  
 SPM-A28C (4081) CCTTATGTACTCTCTTATGTACCCTCTTATGTGCTCTCTTATGTACTCCCTTATGTACTCCTCTTCTGTACTCCTCTTA

Hz\_ABCC2 (107842) TACAAAGTGTGTCGTACCTAATCACATGAAATTAAATACGTTGATATACTGGTTAATACATTGTAGGAAAAGTAAGAGA  
 WT (8822) TACAAAGTGTGTCGTACCTAATCACATGAAATTAAATACGTTGATATACTGGTTAATACATTGTAGGAAAAGTAAGAGA  
 SPM-A28C (4161) TACAAAGTGTGTCGTACCTAATCACATGAAATTAAATACGTTGATATACTGGTTAATACATTGTAGGAAAAGTAAGAGA

Hz\_ABCC2 (107922) ATCTTATGTCGTCGAATTTTTTTTATTTAGAAAATTGATTACAGCGATAACTTTTTTACATTTCGCAGACTTTGAGATCGAAA  
 WT (8902) ATCTTATGTCGTCGAATTTTTTTTATTTAGAAAATTGATTACAGCGATAACTTTTTTACATTTCGCAGACTTTGAGATCGAAA  
 SPM-A28C (4241) ATCTTATGTCGTCGAATTTTTTTTATTTAGAAAATTGATTACAGCGATAACTTTTTTACATTTCGCAGACTTTGAGATCGAAA

Hz\_ABCC2 (108002) ATATCAATTATTCACAAGAGCCGGTGCTGTTCTCGGCTACTCTGCGATACAATTTGGACCCGTTTCGACGATTACAGCGA  
 WT (8981) ATATCAATTATTCACAAGAGCCGGTGCTGTTCTCGGCTACTCTGCGATACAATTTGGACCCGTTTCGACGATTACAGCGA  
 SPM-A28C (4319) ATATCAATTATTCACAAGAGCCGGTGCTGTTCTCGGCTACTCTGCGATACAATTTGGACCCGTTTCGACGATTACAGCGA

Hz\_ABCC2 (108082) CGACGATATTTGGAGGGCGTTGGAACAGGTACGCTTAATTAATACTTCTTAACAGACCCTCGGCACTCGAATAATCT  
 WT (9061) CGACGATATTTGGAGGGCGTTGGAACAGGTACGCTTAATTAATACTTCTTAACAGACCCTCGGCACTCGAATAATCT  
 SPM-A28C (4399) CGACGATATTTGGAGGGCGTTGGAACAGGTACGCTTAATTAATACTTCTTAACAGACCCTCGGCACTCGAATAATCT

Hz\_ABCC2 (108162) AACTAATGAATGAATCTATGATTTTAGGTGGAATTAAGAAGGAATACCGGCTTTAGACTTTAAGGTCGCTGAAGGTGG  
 WT (9141) AACTAATGAATGAATCTATGATTTTAGGTGGAATTAAGAAGGAATACCGGCTTTAGACTTTAAGGTCGCTGAAGGTGG  
 SPM-A28C (4479) AACTAATGAATGAATCTATGATTTTAGGTGGAATTAAGAAGGAATACCGGCTTTAGACTTTAAGGTCGCTGAAGGTGG

Hz\_ABCC2 (108242) TACTAACTTCTCTATGGGACAACGTCAGTTGGTTTGCTTGGCTCGTGCCATTCTACGCTCTAACAAAATACTCATCATGG  
 WT (9221) TACTAACTTCTCTATGGGACAACGTCAGTTGGTTTGCTTGGCTCGTGCCATTCTACGCTCTAACAAAATACTCATCATGG  
 SPM-A28C (4559) TACTAACTTCTCTATGGGACAACGTCAGTTGGTTTGCTTGGCTCGTGCCATTCTACGCTCTAACAAAATACTCATCATGG

Hz\_ABCC2 (108322) ACGAAGCTACCGCTAACGTCGATCCTCAGTAAGTCAATCATTCTATAGTTGTGGTCAATGGCGTTAATTTATTGTTCTAG  
 WT (9301) ACGAAGCTACCGCTAACGTCGATCCTCAGTAAGTCAATCATTCTATAGTTGTGGTCAATGGCGTTAATTTATTGTTCTAG  
 SPM-A28C (4639) ACGAAGCTACCGCTAACGTCGATCCTCAGTAAGTCAATCATTCTATAGTTGTGGTCAATGGCGTTAATTTATTGTTCTAG

Hz\_ABCC2 (108402) GTTTTCCAATGTGTTAAAAGTTTAATTAAGAAGCAAAATATAGATACGTCATTAAATAAATTATTTATTCGGTAATAGGAC  
 WT (9381) GTTTTCCAATGTGTTAAAAGTTTAATTAAGAAGCAAAATATAGATACGTCATTAAATAAATTATTTATTCGGTAATAGGAC  
 SPM-A28C (4719) GTTTTCCAATGTGTTAAAAGTTTAATTAAGAAGCAAAATATAGATACGTCATTAAATAAATTATTTATTCGGTAATAGGAC

Hz\_ABCC2 (108482) TTCCTTATTGGCGAGTTTGTTCATTTTGTTCCTGAATTTAAATACATAATAGTCAGCTAATATAATAATTACTGCAGAG  
 WT (9461) TTCCTTATTGGCGAGTTTGTTCATTTTGTTCCTGAATTTAAATACATAATAGTCAGCTAATATAATAATTACTGCAGAG  
 SPM-A28C (4799) TTCCTTATTGGCGAGTTTGTTCATTTTGTTCCTGAATTTAAATACATAATAGTCAGCTAATATAATAATTACTGCAGAG

Hz\_ABCC2 (108562) AACTTACACGTATTTTCTTACTTATGCATTCTTCTTTTACAGGACGGACGCTTTGATCCAAAAGACGATCCGTCGTCAG  
 WT (9541) AACTTACACGTATTTTCTTACTTATGCATTCTTCTTTTACAGGACGGACGCTTTGATCCAAAAGACGATCCGTCGTCAG  
 SPM-A28C (4879) AACTTACACGTATTTTCTTACTTATGCATTCTTCTTTTACAGGACGGACGCTTTGATCCAAAAGACGATCCGTCGTCAG

Hz\_ABCC2 (108642) TTTGCGTTCGTGCACGGTGCTCACCATCGCGCATCGACTGAACACCATCATGGACTCCGACCGAGTGCTGGTCATGGACCA  
 WT (9621) TTTGCGTTCGTGCACGGTGCTCACCATCGCGCATCGACTGAACACCATCATGGACTCCGACCGAGTGCTGGTCATGGACCA  
 SPM-A28C (4959) TTTGCGTTCGTGCACGGTGCTCACCATCGCGCATCGACTGAACACCATCATGGACTCCGACCGAGTGCTGGTCATGGACCA

Hz\_ABCC2 (108722) GGGCGAAGTGGCCGAGTTTCGACCATCCCCACATCTTGCTCAGCAACCCCAATAGCAAGTTCTTCTCTATGGTCCGAGAGA  
 WT (9701) GGGCGAAGTGGCCGAGTTTCGACCATCCCCACATCTTGCTCAGCAACCCCAATAGCAAGTTCTTCTCTATGGTCCGAGAGA  
 SPM-A28C (5039) GGGCGAAGTGGCCGAGTTTCGACCATCCCCACATCTTGCTCAGCAACCCCAATAGCAAGTTCTTCTCTATGGTCCGAGAGA

Hz\_ABCC2 (108802) CAGGAGAAAGCATGACAAGGACCTTAATGGAGGTGCGTAAGGC  
 WT (9781) CAGGAGAAAGCATGACAAGGACCTTAATGGAGGTGCGTAAGGC  
 SPM-A28C (5119) CAGGAGAAAGCATGACAAGGACCTTAATGGAGGTGCGTAAGGC

Figure S3. Alignment of *Helicoverpa zea* ATP binding cassette transporter subfamily C2 (ABCC2) reference genome sequence from 99,062 to 108,844 bp and amplicon sequences from wild type SIMRU and knockout line SPM-A28C. The nucleotide sequence of SPM-A28C has a 4,645 bp deletion from 99,733 to 104,378 bp (exon 3 to 13) and an insertion at the sgRNA target site in exon 21. Identical nucleotides are shown in white text with black background and alignment gaps are indicated by hyphens. Deletions and insertions caused

by CRISPR/Cas9 editing at sgRNA target sites are marked with red text and nucleotide polymorphisms between the reference genomic scaffold (Accession: KY701524) sequence and amplicon sequences, including those may have been introduced by repair enzymes are shown in dark gray text with white background.

|          |          |                                                                                        |
|----------|----------|----------------------------------------------------------------------------------------|
| Hz_ABCC2 | (104174) | CAATGATGCGAGGAATATCAAAAATCTCAGTTAAGAGCGACACCGAAATGGAACAGAAGGCTCAAATACAGGAGGCAGAG       |
| SPM-B1   | (1)      | CAATGATGCGAGGAATATCAAAAATCTCAGTTAAGAGCGACACCGAAATGGAACAGAAGGCTCAAATACAGGAGGCAGAG       |
| Hz_ABCC2 | (104254) | GAGAGAGCGACAGGTAGCTTGAAGTTTGAGGTGGTGCTCAAGTACCTGAGCTCCGTCCAGTCTGGTGTCTGGTGTTCAC        |
| SPM-B1   | (81)     | GAGAGAGCGACAGGTAGCTTGAAGTTTGAGGTGGTGCTCAAGTACCTGAGCTCCGTCCAGTCTGGTGTCTGGTGTTCAC        |
| Hz_ABCC2 | (104334) | GGCGTTCCTTGCTACTGCTGATCACGCAAGGTGCTGCCACCACTG                                          |
| SPM-B1   | (161)    | GGCGTTCCTTGCTACTGCTGATCACGCAAGGTGCTGCCACCACTG-----CCGACTATTGGTTGAGTTTCTGGTAAGATAATGAAT |
| Hz_ABCC2 | (104414) | TATTTTTCAAAAATTTAATTTAACGGAACAAAGAACGTATTTTAAATTGGCTTCTCTGAATATGTCTTAAATGTCTCCT        |
| SPM-B1   | (205)    | -----                                                                                  |
| Hz_ABCC2 | (104494) | GATAGTTAACATTTTGATTGCAGGACTAACCAAGTGGATTCTTATGAACAATCTTTACCTGAAGGCGTGGATCCAGGTAA       |
| SPM-B1   | (205)    | -----                                                                                  |
| Hz_ABCC2 | (104574) | GTCTACGAAATATCTCTGTTTTATTTATATGAACTTCCTGCGTATGTACCATTTCAGTTCTAAGATCTCAACCTCAACT        |
| SPM-B1   | (205)    | -----                                                                                  |
| Hz_ABCC2 | (104654) | AAAAAGTTATTTCTTTTCAGATACTGACATGAACGCACAAATTGGCTTACTTACAACCTGCCAGTACCTATACGTTTTTCG      |
| SPM-B1   | (205)    | -----                                                                                  |
| Hz_ABCC2 | (104734) | GTGGAGTTATATTGGCTTTAATAGTCATGACCCTCGTCAGAATCACAGCTTTCGTAGCGATGACAATGCGAGCTTCTCAA       |
| SPM-B1   | (205)    | -----                                                                                  |
| Hz_ABCC2 | (104814) | AATCTTCACAACACTATTTACGAAAAATTAATTGTGACAGTAATGAGATTTTCGATACCAATCCTTCTGGTGAGTAACA        |
| SPM-B1   | (205)    | -----                                                                                  |
| Hz_ABCC2 | (104894) | TTCATCATTACACATAACATTATTTATTTAAGTGATCACATAAAAAAGTGCCATAGCATTTCGCGAGACAGTCAGTTAGA       |
| SPM-B1   | (205)    | -----                                                                                  |
| Hz_ABCC2 | (104974) | TAAGTAGAGATAATGATTTTAAATCAAAGTAACGGACTCTCTCAATGTTAGAAGTGTAGGTAATTAGCGATAATTGCA         |
| SPM-B1   | (205)    | -----                                                                                  |
| Hz_ABCC2 | (105054) | CTGGCCAAGTGCCAGGTGGCGTGAGTAGACCTTAACATTAGTACACGCCAATTGCAACGACGGTAGCCAAGATAGCTT         |
| SPM-B1   | (205)    | -----                                                                                  |
| Hz_ABCC2 | (105134) | GGATAATAACAACATCTTTAATGAGTTCGCAACTTTCGACTTGTGATTTTGGTGGCAGTAGATTTAAGAAAACGTTGTA        |
| SPM-B1   | (205)    | -----                                                                                  |
| Hz_ABCC2 | (105214) | CATATGTGTAGTATAAGATGATGATACATTCTAGGCTATCCGTATTTTTTTAGATTATGATTTATTAAATGCAAGAAGAT       |
| SPM-B1   | (205)    | -----                                                                                  |
| Hz_ABCC2 | (105294) | GATGCAATGAAATTAATTTACAACATCATGCTTATTGGAGCTTCTTTTGAATTTTCGAGGTCGTGTGCTGAACAGATTCT       |
| SPM-B1   | (205)    | -----                                                                                  |
| Hz_ABCC2 | (105374) | CAAAAGACATGGGTGCCATGGATGAGCTTCTTCCTCGCAGTCTTTTAGAAACAGTTCAGATGTATTTGTCGCTGACCAGT       |
| SPM-B1   | (205)    | -----                                                                                  |
| Hz_ABCC2 | (105454) | GTGTTGGTGCTGAACGCCACTGCATTGCCCTGGACGCTTATACCTACCTCCGTGTTGATTGTCATCTTCGTGCTCATGTT       |
| SPM-B1   | (205)    | -----                                                                                  |
| Hz_ABCC2 | (105534) | GAGATGGTACCTGAATACAGCTCAGGCTGTCAAACGTTTGGAGGGCACAAGTAAGTGTTACATGAACCATAGGCGTTATT       |
| SPM-B1   | (205)    | -----                                                                                  |
| Hz_ABCC2 | (105614) | TAAGAACAAATATTGATTTAGAGTGTAATTAATTAACGGTTAGAACATCGCTAATAGTTTGGTGCCTCGTTGGTCTA          |
| SPM-B1   | (205)    | -----                                                                                  |
| Hz_ABCC2 | (105694) | GAGGTCGCAAGCGCGGCTGCTGTGCTCGAGGTCTCGGGTTCGATTCCCGGTCAGGCCGAAATCGCTTTGTGGGTTTTCA        |
| SPM-B1   | (205)    | -----                                                                                  |
| Hz_ABCC2 | (105774) | TAACTTTTCAAAAGCAGCCCGTAGCCTGGAAGTTGGTGATTGATTACCCGTGCATCGGAGAGCACGTAAATGTGGTTC         |
| SPM-B1   | (205)    | -----                                                                                  |
| Hz_ABCC2 | (105854) | CTGCGCCTGATCTCTTTCCGGTCGTGTCGGATTGCCGTCCCATCGGGTTATGAGAGTGAAGGAATAGGGAGTGCACCTGT       |
| SPM-B1   | (205)    | -----                                                                                  |
| Hz_ABCC2 | (105934) | GTCTGCGCAAATGCTCGTGCACTATAATATGTCTGCGCAGCTGGCTGATCTCCTTTAATGAGAACAGCCGCGGTGGCCG        |
| SPM-B1   | (205)    | -----                                                                                  |

Hz\_ABCC2 (106014) **AAATCGGCCGTGGACGCCATTATTAATAGTTTGAATAAAATTATTTTAATTTTGTTTTATTCTACTTACAGCCAAGA**  
 SPM-B1 (205) -----

Hz\_ABCC2 (106094) **GTCCTGTATTTGGAATGATTAACCTCACTATTCTGGACTCTCCACTATTAGAAGTTCGGGTCCAGGATAGACAGATG**  
 SPM-B1 (205) -----

Hz\_ABCC2 (106174) **AAATTGTTTGACGAAGCGCAGGTAAACATGAAGCTTATTATTTTTTTATATTAATTAATAATACATCTAAAAAGATTTAT**  
 SPM-B1 (205) -----

Hz\_ABCC2 (106254) CCAATA**GTAATGGTTATATATTTCTTATTGCTGTTTACAGAATCTCCACACAAGTGCTTTCCACACATTCTTC**GGCGGTT  
 SPM-B1 (205) CCAATT**GTAATGGTTATATATTTCTTATTGCTGTTTACAGAATCTCCACACAAGTGCTTTCCACACATTCTTC**GGCGGTT

Hz\_ABCC2 (106334) CTACGGCATTTCGATTGTATCTCGATACTTTGTGTTTGACCTACCTCGGTGTCGTCATGTCAATTTTCATTTTGGGCGAC  
 SPM-B1 (285) TTACGGCATTTCGATTGTATCTCGATACTTTGTGTTTGACCTACCTCGGTGTCGTCATGTCAATTTTCATTTTGGGCGAC

Hz\_ABCC2 (106414) TTTGGTGAGCACTTTTCTTTAGGCACATTAAAGGCAATATTTACACATTTCAGTTCATAGTGTGATATCTTTGGCATT  
 SPM-B1 (365) TTTGGTGAGCACTTTTCTTTTGGCACATTAAAGACAATATTTACACATTTCAGTTCATAGTGTAAATATCTTTGGCATT

Hz\_ABCC2 (106494) ACCATTCCATGTTGATAGAACAGAATTTGCTTATTTTGTGTTTTTTTTTTCTTCCAGGTGATTTGATCCCGGTGGGAAG  
 SPM-B1 (445) ACCATTCCATGTTGATAGAACAGAATTTGCTTATTTTGTGTTTTTTTTTTCTTCCAGGTGATTTGATCCCGGTGGGAAG

Hz\_ABCC2 (106574) TGTCGGTCTGGCTGTCAGTCAGTCCATGGTGCTGACCATGATGTTGCAGATGGCAGCTAGGTTTCACAGCTGACTTTTTGG  
 SPM-B1 (524) TGTCGGTCTGGCTGTCAGTCAGTCCATGGTGCTGACCATGATGTTGCAGATGGCATTAGGTTTCACAGCTGACTTTTTGG

Hz\_ABCC2 (106654) GGCAAATGACGGCTGTGGAGAGAGTTCTGGAAATACACCAAGCTACCCACGG**AGACCAATAT**GGAGCAAGGACGTAAGTAC  
 SPM-B1 (604) GGCAAATGACGGCTGTGGAGAGAGTTCTGGAAATACACCAAGCTACCCACGG-----GGAGCAAGGACGTAAGTAC

Hz\_ABCC2 (106734) AATCATTCGTTTTGAGATAGTTAGGTAATCTGACTTTGATTATTAAGTCCTTATCTGTCTAGCCTTTTTTCCAACATATGTT  
 SPM-B1 (674) AATCATTCGTTTTGAGATAGTTAGGTAATCTGACTTTGATTATTAAGTCCTTATCTGTCTAGCCTTTTTTCCAACATATGTT

Hz\_ABCC2 (106814) CGGTACTTCTTCCAGTCTATGTGATTGGATGCAGTAATGAAAACAGTTTTTACATAGGCGACTGCCTATCTGAACCTCT  
 SPM-B1 (754) CGGTACTTCTTCCAGTCTATGTGATTGGATGCAGTAATGAAAACAGTTTTTACATAGGCGACTGCCTATCTGAACCTCT

Hz\_ABCC2 (106894) AAATCTAGTTACCCGGGTAACCCGATATCCCTTTGGTTGTCAAATTTTGGCTCTGGCTTCTGACTACCGGCCAACCAAAA  
 SPM-B1 (834) AAATCTAGTTACCCGGGTAACCCGATATCCCTTTGGTTGTCAAATTTTGGCTCTGGCTTCTGACTACCGGCCAACCAAAA

Hz\_ABCC2 (106974) CAAGGACGATAAGTTATAACATAGATATATTGATTTTCAGCAACTAACCCACCAAGGAATGGCCAGTGCTGGTAGAGT  
 SPM-B1 (914) CAAGGACGATAAGTTATAACATAGATATATTGATTTTCAGCAACTAACCCACCAAGGAATGGCCAGTGCTGGTAGAGT

Hz\_ABCC2 (107054) GACGTTCTCAAATGTGTACCTGAATTATTCATGGAAGACCCGCCGGTGCTGAAGGACTTAAACTTTGAAATTCAAAGCG  
 SPM-B1 (994) GACGTTCTCAAATGTGTACCTGAATTATTCATGGAAGACCCGCCGGTGCTGAAGGACTTAAACTTTGAAATTCAAAGCG

Hz\_ABCC2 (107134) GCTGGAAGGTAAGAGACCTAATAATGTATTTGATTAAAATAAAAGCAATAAAGATATACTTGCCGTGCTACCCTAAACTA  
 SPM-B1 (1074) GCTGGAAGGTAAGAGACCTAATAATGTATTTGATTAAAATAAAAGCAATAAAGATATACTTGCCGTGCTACCCTAAACTA

Hz\_ABCC2 (107214) CCCGTGTTCCATGTATTATTTCAGATAAATTCCATCCAAAGGTTGTCTAGAAGAAATCGCTGTTTGGCGATAAGACGGCCA  
 SPM-B1 (1154) CCCGTGTTCCATGTATTATTTCAGATAAATTCCATCCAAAGGTTGTCTAGAAGAAATCGCTGTTTGGCGATAAGACGGCCA

Hz\_ABCC2 (107294) ATTATACTGTTCTTTGTGTATATGATTATCAAGATGATATGATGAGAAGATTTATAAAGAATAATCTATCTATGTATTT  
 SPM-B1 (1234) ATTATACTGTTCTTTGTGTATATGATTATCAAGATGATATGATGAGAAGATTTATAAAGAATAATCTATCTATGTATTT

Hz\_ABCC2 (107374) GCTTACTTAATGTAATGAATGTTGTAGGTTGGAGTTGTAGGCAGAACAGGAGCCGGCAAGTCATCGCTCATCGCGGCTTT  
 SPM-B1 (1314) GCTTACTTAATGTAATGAATGTTGTAGGTTGGAGTTGTAGGCAGAACAGGAGCCGGCAAGTCATCGCTCATCGCGGCTTT

Hz\_ABCC2 (107454) GTTCCGGCTTAGTGACATAAGCGGCAGCATCAAAATTGACGGTGTTGGACACCGAAGGATTAGCCAAAAAGGTATCGATGT  
 SPM-B1 (1394) GTTCCGGCTTAGTGACATAAGCGGCAGCATCAAAATTGACGGTGTTGGACACCGAAGGATTAGCCAAAAAGGTATCGATGT

Hz\_ABCC2 (107534) TAAAAAATACATTCTTTCTAAAAGACTTAGTGAAGTATTATTTATTGTTTAGTTAAATTACTAATAGAATTTGTGGATTT  
 SPM-B1 (1474) TAAAAAATACATTCTTTCTAAAAGACTTAGTGAAGTATTATTTATTGTTTAGTTAAATTACTAATAGAATTTGTGGATTT

Hz\_ABCC2 (107614) GTTGAAAATATATTAACGGCACGAGCTCGTGGTTTCCAGCACCCGGATAAAAAATATCCTTTTTATTGCAATTTTATTGCG  
 SPM-B1 (1554) GTTGAAAATATATTAACGGCACGAGCTCGTGGTTTCCAGCACCCGGATAAAAAATATCCTTTTTATTGCAATTTTATTGCG

Hz\_ABCC2 (107694) ACTCTCTTTTATGAACCTCTTATGTACTCACCTTAAGTACTCTCTTATGTAAGATCTCATGTACTTCCCTTATGTACTC  
 SPM-B1 (1634) ACTCTCTTTTATGAACCTCTTATGTACTCACCTTAAGTACTCTCTTATGTAAGATCTCATGTACTTCCCTTATGTACTC

Hz\_ABCC2 (107774) TCTTATGTACCTCTTATGTGCTCTCTTATGTACTCCCCTTATGTACTCCTCTTCTGTACTCCTCTTATACAAAGTGTGT  
 SPM-B1 (1714) TCTTACGTACCTCTTATGTGCTCTCTTATGTACTCCCCTTATGTACTCCTCTTCTGTACTCCTCTTATACAAAGTGTGT

Hz\_ABCC2 (107854) CGTACCTAATCACATGAAATTAAATACGTTGATATACTGGTTAATACATTTGTAGGAAAAGTAAGAGAATCTTATGTCGT  
 SPM-B1 (1794) CGTACCTAATCACATGAAATTAAATACGTTGATATACTGGTTAATACATTTGTAGGAAAAGTAAGAGAATCTTATGTCGT

|                   |                                                                                    |                                                                |
|-------------------|------------------------------------------------------------------------------------|----------------------------------------------------------------|
| Hz_ABCC2 (107934) | CAATTTTTTTTTATTTAGAA                                                               | AATTGATTTCAGCGATAACTTTTTACATTTCGCAGACTTTGAGATCGAAAATATCAATTATT |
| SPM-B1 (1874)     | CAATTTTTTTTTATTTAGAAC                                                              | AATTGATTTCAGCGATAACTTTTTACATTTCGCAGACTTTGAGATCGAAAATATCAATTATT |
| Hz_ABCC2 (108014) | CCACAAGAGCCGGTGCTGTTCTCGGCTACTCTGCGATACAATTGGACCCGTTTCGACGATTACAGCGACGACGATATTTG   |                                                                |
| SPM-B1 (1954)     | CCACAAGAGCCGGTGCTGTTCTCGGCTACTCTGCGATACAATTGGACCCGTTTCGACGATTACAGCGACGACGATATTTG   |                                                                |
| Hz_ABCC2 (108094) | GAGGGCGTTGGAACAGGTACGCTTAATTAAATTACTTCT                                            | TAAACAGACCCTCGGCACTCGAACTAATCTAACTAATGAATG                     |
| SPM-B1 (2034)     | GAGGGCGTTGGAACAGGTACGCTTAATTAAATTACTTCT                                            | TAAACAGACCCTCGGCACTCGAACTAATCTAACTAATGAATG                     |
| Hz_ABCC2 (108174) | AATCTATGATTTTAGGTGGAATTAAAAGAAGGAATACCGGCTTTAGACTTTAAGGTCGCTGAAGGTGGTACTAACTTCTC   |                                                                |
| SPM-B1 (2114)     | AATCTATGATTTTAGGTGGAATTAAAAGAAGGAATACCGGCTTTAGACTTTAAGGTCGCTGAAGGTGGTACTAACTTCTC   |                                                                |
| Hz_ABCC2 (108254) | TATGGGACAACGTCAGTTGGTTTGCTTGGCTCGTGCCATTCTACGCTCTAACAAAATACTCATCATGGACGAAGCTACCG   |                                                                |
| SPM-B1 (2194)     | TATGGGACAACGTCAGTTGGTTTGCTTGGCTCGTGCCATTCTACGCTCTAACAAAATACTCATCATGGACGAAGCTACCG   |                                                                |
| Hz_ABCC2 (108334) | CTAACGTCGATCCTCAGTAAGTCAATCATTCTATAGTTGTGGTCAATGGCGTTAATTTATTGTTCTAGGTTTTCCAATGT   |                                                                |
| SPM-B1 (2274)     | CTAACGTCGATCCTCAGTAAGTCAATCATTCTATAGTTGTGGTCAATGGCGTTAATTTATTGTTCTAGGTTTTCCAATGT   |                                                                |
| Hz_ABCC2 (108414) | GTTAAAAGTTTAATTTAAAAGCAAAATATAGATACGTCATTAAATAAATTATTTATTTCGGTAATAGGACTTCCTTATTGGC |                                                                |
| SPM-B1 (2354)     | GTTAAAAGTTTAATTTAAAAGCAAAATATAGATACGTCATTAAATAAATTATTTATTTCGGTAATAGGACTTCCTTATTGGC |                                                                |
| Hz_ABCC2 (108494) | GAGTTTGTTCATTTTGTTCCTGAATTTAAATACATAATAGTCAGCTAATATAATAATTACTGCAGAGAACTTACACGTA    |                                                                |
| SPM-B1 (2434)     | GAGTTTGTTCATTTTGTTCCTGAATTTAAATACATAATAGTCAGCTAATATAATAATTACTGCAGAGAACTTACACGTA    |                                                                |
| Hz_ABCC2 (108574) | TTTTTCTTACTTATGCATTCTTCTTTTACAGGACGGACGCTTTGATCCAAAAGACGATCCGTCGTCAGTTTTCGTCGTCG   |                                                                |
| SPM-B1 (2514)     | TTTTTCTTACTTATGCATTCTTCTTTTACAGGACGGACGCTTTGATCCAAAAGACGATCCGTCGTCAGTTTTCGTCGTCG   |                                                                |
| Hz_ABCC2 (108654) | ACGGTGCTCACCATCGCGCATCGACTGAACACCATCATGGACTCCGACCGAGTGCTGGTCATGGACCAGGGCGAAGTGCC   |                                                                |
| SPM-B1 (2594)     | ACGGTGCTCACCATCGCGCATCGACTGAACACCATCATGGACTCCGACCGAGTGCTGGTCATGGACCAGGGCGAAGTGCC   |                                                                |
| Hz_ABCC2 (108734) | CGAGTTTCGACCATCCCCACATCTTGCTCAGCAACCCCAATAGCAAGTTCTTCTCTATGGTCCGAGAGACAGGAGAAAGCA  |                                                                |
| SPM-B1 (2674)     | CGAGTTTCGACCATCCCCACATCTTGCTCAGCAACCCCAATAGCAAGTTCTTCTCTATGGTCCGAGAGACAGGAGAAAGCA  |                                                                |
| Hz_ABCC2 (108814) | TGACAAGGA                                                                          |                                                                |
| SPM-B1 (2754)     | TGACAAGGA                                                                          |                                                                |

Figure S4. Alignment of *Helicoverpa zea* ATP binding cassette transporter subfamily C2 (ABCC2) reference genome sequence from 104,174 to 108,822 bp and amplicon sequence from the knockout line SPM-B1 with 1,876 bp and 10 bp deletions at the sgRNA target sites of exon 13 and exon 19, respectively. Identical nucleotides are shown in white text with black background and alignment gaps are indicated by hyphens. Deletions and insertions caused by CRISPR/Cas9 editing at sgRNA target sites are marked with red text and nucleotide polymorphisms between the reference genomic scaffold (Accession: KY701524) sequence and amplicon sequences, including those may have been introduced by repair enzymes are shown in dark gray text with white background.

|            |       |                                                                                    |
|------------|-------|------------------------------------------------------------------------------------|
| KM360184   | (1)   | ATGGGCGTAGAAAATAAGAATAATGTACAAAATGCGGAAGGTCCGGCCCGCAAGACTTACAAAAACCGAACATTTTATC    |
| SPM-8      | (1)   | -----                                                                              |
| SPM-16     | (1)   | -----                                                                              |
| SPM-B1     | (1)   | -----                                                                              |
| SPM-A28C   | (1)   | -----                                                                              |
|            |       |                                                                                    |
| KM360184   | (81)  | CCGTATATTTCTCTGGTGGATGTGTCCTGTGCTTATAACACACTTTAACAAAAGAAATGTAGAAGAATCAGATCTTATAC   |
| SPM-8      | (1)   | -----                                                                              |
| SPM-16     | (1)   | -----                                                                              |
| SPM-B1     | (1)   | -----                                                                              |
| SPM-A28C   | (1)   | -----                                                                              |
|            |       |                                                                                    |
| KM360184   | (161) | CGCCCAGTAATTTATATAAATTCAGAAAGACAAGGAGAGTATCTTGAAAGATACTGGTTGGCAGAGATAGAAAATGCAACA  |
| SPM-8      | (1)   | -----                                                                              |
| SPM-16     | (1)   | -----                                                                              |
| SPM-B1     | (1)   | -----                                                                              |
| SPM-A28C   | (1)   | -----                                                                              |
|            |       |                                                                                    |
| KM360184   | (241) | ATTGAAAAATCGGGAGCCGTCACTATGGAAGGCATTACGAAAGGCCTACTGGGTCTCCTACATGCCAGGAGCTATTTTTAT  |
| SPM-8      | (1)   | -----TGAAGGCATTACGAAAGGCCTACTGGGTCTCCTACATGCCAGGAGCTATTTTTAT                       |
| SPM-16     | (1)   | -----TGAAGGCATTACGAAAGGCCTACTGGGTCTCCTACATGCCAGGAGCTATTTTTAT                       |
| SPM-B1     | (1)   | -----TGAAGGCATTACGAAAGGCCTACTGGGTCTCCTACATGCCAGGAGCTATTTTTAT                       |
| SPM-A28C   | (1)   | -----TGAAGGCATTACGAAAGGCCTACTGGGTCTCCTACATGCCAGGAGCTATTTTTAT                       |
|            |       |                                                                                    |
| KM360184   | (321) | CATCATTCAATCTGCAGCCAGGACGTATCAGCCGCTGTTGTTTTCTCAGCTACTGTCGTACTGGTCGGTGGACAGTGAAA   |
| SPM-8      | (57)  | CATCATTCAATCTGCAGCCAGGACGTATCAGCCGCTGTTGTTTTCTCAGTTACTGTGTCGTACTGGTCGGTGGACAGTGAAA |
| SPM-16     | (57)  | CATCATTCAATCTGCAGCCAGGACGTATCAGCCGCTGTTGTTTTCTCAGTTACTGTGTCGTACTGGTCGGTGGACAGTGAAA |
| SPM-B1     | (57)  | CATCATTCAATCTGCAGCCAGGACGTATCAGCCGCTGTTGTTTTCTCAGTTACTGTGTCGTACTGGTCGGTGGACAGTGAAA |
| SPM-A28C   | (57)  | CATCATTCAATCTGCAGCCAGGACGTATCAGCCGCTGTTGTTTTCTCAGTTACTGTGTCGTACTGATACG-----        |
|            |       |                                                                                    |
| KM360184   | (401) | TGACTCAGCAAGACGCTGGCCTCTATGCTCTCGCCATGCTGGGACTGAACTTCGCTCTCCATGATGTGTCAGCACCACAAC  |
| SPM-8_mRNA | (137) | TGACTCAGCAAGACGCTGGCCTCTATGCTCTCGCCATGCTGGGACTGAACTTCGCTCTCCATGATGTGTCAGCACCACAAC  |
| SPM-16     | (137) | TGACTCAGCAAGACGCTGGCCTCTATGCTCTCGCCATGCTGGGACTGAACTTCGCTCTCCATGATGTGTCAGCACCACAAC  |
| SPM-B1     | (137) | TGACTCAGCAAGACGCTGGCCTCTATGCTCTCGCCATGCTGGGACTGAACTTCGCTCTCCATGATGTGTCAGCACCACAAC  |
| SPM-A28C   | (125) | -----                                                                              |
|            |       |                                                                                    |
| KM360184   | (481) | ACACTGTTTGTGATGCGGTTTCAGTTTAAAAGTCAAGGTTGCCTGTTCTTCGCTTTTGTATAGGAAGTTGCTCCGCATGAC  |
| SPM-8_mRNA | (217) | ACACTGTTTGTGATGCGGTTTCAGTTTAAAAGTCAAGGTTGCCTGTTCTTCGCTTTTGTATAGGAAGTTGCTCCGCATGAC  |
| SPM-16     | (217) | ACACTGTTTGTGATGCGGTTTCAGTTTAAAAGTCAAGGTTGCCTGTTCTTCGCTTTTGTATAGGAAGTTGCTCCGCATGAC  |
| SPM-B1     | (217) | ACACTGTTTGTGATGCGGTTTCAGTTTAAAAGTCAAGGTTGCCTGTTCTTCGCTTTTGTATAGGAAGTTGCTCCGCATGAC  |
| SPM-A28C   | (125) | -----                                                                              |
|            |       |                                                                                    |
| KM360184   | (561) | CCAAGTGTCGGTGGGTGAGGTGGCAGGAGGAAAGCTGGTGAACCTTGCTGTCCAACGATATCAGCAGGTTTCGACTACGCGT |
| SPM-8_mRNA | (297) | CCAAGTGTCGGTGGGTGAGGTGGCAGGAGGAAAGCTGGTGAACCTTGCTGTCCAACGATATCAGCAGGTTTCGACTACGCGT |
| SPM-16     | (297) | CCAAGTGTCGGTGGGTGAGGTGGCAGGAGGAAAGCTGGTGAACCTTGCTGTCCAACGATATCAGCAGGTTTCGACTACGCGT |
| SPM-B1     | (297) | CCAAGTGTCGGTGGGTGAGGTGGCAGGAGGAAAGCTGGTGAACCTTGCTGTCCAACGATATCAGCAGGTTTCGACTACGCGT |
| SPM-A28C   | (125) | -----                                                                              |
|            |       |                                                                                    |
| KM360184   | (641) | TCATGTTTCCTACATTACTTGTGGATCGTGCCTATCCAAGTGGCTGTTGTTTTGTACTTCTTGTGGGAGGCTGCTGGCTTC  |
| SPM-8_mRNA | (377) | TCATGTTTCCTACATTACTTGTGGATCGTGCCTATCCAAGTGGCTGTTGTTTTGTATTTCTTGTGGGAGGCTGCTGGCTTC  |
| SPM-16     | (377) | TCATGTTTCCTACATTACTTGTGGATCGTGCCTATCCAAGTGGCTGTTGTTTTGTATTTCTTGTGGGAGGCTGCTGGCTTC  |
| SPM-B1     | (377) | TCATGTTTCCTACATTACTTGTGGATCGTGCCTATCCAAGTGGCTGTTGTTTTGTATTTCTTGTGGGAGGCTGCTGGCTTC  |
| SPM-A28C   | (125) | -----                                                                              |
|            |       |                                                                                    |
| KM360184   | (721) | GCACCCCTTCGTCGGTCTGTTTGGAGTCGTTATACTGATTTTACCACTGCAAGCTGGCTTGACGAAACTCACAACCTGTTGT |
| SPM-8_mRNA | (457) | GCACCCCTTCGTCGGTCTGTTTGGAGTCGTTATACTGATTTTACCACTGCAAGCTGGCTTGACGAAACTCACAACCTGTTGT |
| SPM-16     | (457) | GCACCCCTTCGTCGGTCTGTTTGGAGTCGTTATACTGATTTTACCACTGCAAGCTGGCTTGACGAAACTCACAACCTGTTGT |
| SPM-B1     | (457) | GCACCCCTTCGTCGGTCTGTTTGGAGTCGTTATACTGATTTTACCACTGCAAGCTGGCTTGACGAAACTCACAACCTGTTGT |
| SPM-A28C   | (125) | -----                                                                              |
|            |       |                                                                                    |
| KM360184   | (801) | AAGACGTGAGACGGCTAAGAGAACGGACAGGCGAATTAACTAATGAGTGAAATTATTGGTGGTATTCAGGTCATTAAAA    |
| SPM-8_mRNA | (537) | AAGACGTGAGACGGCTAAGAGAACGGACAGGCGAATTAACTAATGAGTGAAATTATTGGTGGTATTCAGGTCATTAAAA    |
| SPM-16     | (537) | AAGACGTGAGACGGCTAAGAGAACGGACAGGCGAATTAACTAATGAGTGAAATTATTGGTGGTATTCAGGTCATTAAAA    |
| SPM-B1     | (537) | AAGACGTGAGACGGCTAAGAGAACGGACAGGCGAATTAACTAATGAGTGAAATTATTGGTGGTATTCAGGTCATTAAAA    |
| SPM-A28C   | (125) | -----                                                                              |
|            |       |                                                                                    |
| KM360184   | (881) | TGTACGCTTGGGAGAAACCCCTTCAGCTAGTTGTGAAGGCAGCTCGTGCCTTTGAAATGAGTGCCCTCAGGAAGTCCATC   |
| SPM-8_mRNA | (617) | TGTACGCTTGGGAGAAACCCCTTCAGCTAGTTGTGAAGGCAGCTCGTGCCTTTGAAATGAGTGCCCTCAGGAAGTCCATC   |
| SPM-16     | (617) | TGTACGCTTGGGAGAAACCCCTTCAGCTAGTTGTGAAGGCAGCTCGTGCCTTTGAAATGAGTGCCCTCAGGAAGTCCATC   |
| SPM-B1     | (617) | TGTACGCTTGGGAGAAACCCCTTCAGCTAGTTGTGAAGGCAGCTCGTGCCTTTGAAATGAGTGCCCTCAGGAAGTCCATC   |
| SPM-A28C   | (125) | -----                                                                              |

KM360184 (961) TTCATCAGGAGTACTTTCCTAGGGTTCATGTTGTTCACTGAGCGAAGCATCATGTTTGTACAGTGTTGACACTCGCTCT  
 SPM-8\_mRNA (697) TTCATCAGGAGTACTTTCCTAGGGTTCATGTTGTTCACTGAGCGAAGCATCATGTTTGTACAGTGTTGACACTCGCTCT  
 SPM-16 (697) TTCATCAGGAGTACTTTCCTAGGGTTCATGTTGTTCACTGAGCGAAGCATCATGTTTGTACAGTGTTGACACTCGCTCT  
 SPM-B1 (697) TTCATCAGGAGTACTTTCCTAGGGTTCATGTTGTTCACTGAGCGAAGCATCATGTTTGTACAGTGTTGACACTCGCTCT  
 SPM-A28C (125) -----  
  
 KM360184 (1041) CACAGGCACTATGATTACTGCCACTACGATATACCCTATTCAACAGTACTTCAGTATTATTTCAGTTCAATGTAACACTGA  
 SPM-8\_mRNA (777) CACAGGCACTATGATTACTGCCACTACGATATACCCTATTCAACAGTACTTCAGTATTATTTCAGTTTAACGTAACACTGA  
 SPM-16 (777) CACAGGCACTATGATTACTGCCACTACGATATACCCTATTCAACAGTACTTCAGTATTATTTCAGTTTAACGTAACACTGA  
 SPM-B1 (777) CACAGGCACTATGATTACTGCCACTACGATATACCCTATTCAACAGTACTTCAGTATTATTTCAGTTTAACGTAACACTGA  
 SPM-A28C (125) -----  
  
 KM360184 (1121) TCATTTCCTATGGCAATCGCAAGTTATTCCGAGATGATGGTGTCCATAGAACGTATCCAGGGATTTCCTTAGTTTGGACGAG  
 SPM-8\_mRNA (857) TCATTTCCTATGGCAATCGCAAGTTATTCCGAGATGATGGTGTCCATAGAACGTATCCAGGGATTTCCTTAGTTTGGACGAG  
 SPM-16 (857) TCATTTCCTATGGCAATCGCAAGTTATTCCGAGATGATGGTGTCCATAGAACGTATCCAGGGATTTCCTTAGTTTGGACGAG  
 SPM-B1 (857) TCATTTCCTATGGCAATCGCAAGTTATTCCGAGATGATGGTGTCCATAGAACGTATCCAGGGATTTCCTTAGTTTGGACGAG  
 SPM-A28C (125) -----  
  
 KM360184 (1201) CGGTCCGACATGCAAGTGACTCCAAAAATCAATGGATCTAACAATAACACTTTGTTTAAATCCAAGAAGTCACCACTTGA  
 SPM-8 (937) CGGTCCGACATGCAAGTGACTCCAAAAATTAATGGATCTAACAATAACACTTTGTTTAAATCCAAGAAGTCACCACTTGA  
 SPM-16 (937) CGGTCCGACATGCAAGTGACTCCAAAAATTAATGGATCTAACAATAACACTTTGTTTAAATCCAAGAAGTCACCACTTGA  
 SPM-B1 (937) CGGTCCGACATGCAAGTGACTCCAAAAATTAATGGATCTAACAATAACACTTTGTTTAAATCCAAGAAGTCACCACTTGA  
 SPM-A28C (125) -----  
  
 KM360184 (1281) AGTAGGCATCGTGCCCTAAGAAATACTCACCTAGTGAAGTTATGGCTGCAAAGGAGATGCAGGATGATCCTACCCAGATGG  
 SPM-8 (1017) AGTAGGCATCGTGCCCTAAGAAATACTCACCTAGTGAAGTTATGGCTGCAAAGGAGATGCAGGATGATCCTACCCAGATGG  
 SPM-16 (1017) AGTAGGCATCGTGCCCTAAGAAATACTCACCTAGTGAAGTTATGGCTGCAAAGGAGATGCAGGATGATCCTACCCAGATGG  
 SPM-B1 (1017) AGTAGGCATCGTGCCCTAAGAAATACTCACCTAGTGAAGTTATGGCTGCAAAGGAGATGCAGGATGATCCTACCCAGATGG  
 SPM-A28C (125) -----  
  
 KM360184 (1361) ACTATCCTATCAGGCTTAACAAAGTAAGCGCATCGTGACCGGCAGCAATAGTTCTTCAGAAATGACACTTAAGAATATA  
 SPM-8 (1097) ACTATCCTATCAGGCTTAACAAAGTAAGCGCATCGTGACCGGCAGCAATAGTTCTTCAGAAATGACACTTAAGAATATA  
 SPM-16 (1097) ACTATCCTATCAGGCTTAACAAAGTAAGCGCATCGTGACCGGCAGCAATAGTTCTTCAGAAATGACACTTAAGAATATA  
 SPM-B1 (1097) ACTATCCTATCAGGCTTAACAAAGTAAGCGCATCGTGACCGGCAGCAATAGTTCTTCAGAAATGACACTTAAGAATATA  
 SPM-A28C (125) -----  
  
 KM360184 (1441) TCGTTACGTATTCGTAAAGGAAAATTGTGTGCTATCATTTGGTCTGTGGGGTCCGGAAGACATCTCTACTGCAACTGCT  
 SPM-8 (1177) TCGTTACGTATTCGTAAAGGAAAATTGTGTGCTATCATTTGGTCTGTGGGGTCCGGAAGACATCTCTACTGCAACTGCT  
 SPM-16 (1177) TCGTTACGTATTCGTAAAGGAAAATTGTGTGCTATCATTTGGTCTGTGGGGTCCGGAAGACATCTCTACTGCAACTGCT  
 SPM-B1 (1177) TCGTTACGTATTCGTAAAGGAAAATTGTGTGCTATCATTTGGTCTGTGGGGTCCGGAAGACATCTCTACTGCAACTGCT  
 SPM-A28C (125) -----  
  
 KM360184 (1521) CTTAAAAGAATTACCATTGAATAGTGGTACACTTGACGTGAGCGGGAAAATGTCGTACGCTTGTCAAGAGTCTTGGCTGT  
 SPM-8 (1257) CTTAAAAGAATTACCATTGAATAGTGGTACACTTGACGTGAGCGGGAAAATGTCGTACGCTTGTCAAGAGTCTTGGCTGT  
 SPM-16 (1257) CTTAAAAGAATTACCATTGAATAGTGGTACACTTGACGTGAGCGGGAAAATGTCGTACGCTTGTCAAGAGTCTTGGCTGT  
 SPM-B1 (1257) CTTAAAAGAATTACCATTGAATAGTGGTACACTTGACGTGAGCGGGAAAATGTCGTACGCTTGTCAAGAGTCTTGGCTGT  
 SPM-A28C (125) -----  
  
 KM360184 (1601) TCCCAGGCACAGTACGAGAAAAACATTTTGTTCGGCCTAACTTACGAACCCACAAAATACAAAGAGGTTTGCAAGGTGTGT  
 SPM-8 (1337) TCCCAGGCACAGTACGAGAAAAACATTTTGTTCGGCCTAACTTACGAACCCACAAAATACAAAGAGGTTTGCAAGGTGTGT  
 SPM-16 (1337) TCCCAGGCACAGTACGAGAAAAACATTTTGTTCGGCCTAACTTACGAACCCACAAAATACAAAGAGGTTTGCAAGGTGTGT  
 SPM-B1 (1337) TCCCAGGCACAGTACGAGAAAAACATTTTGTTCGGCCTAACTTACGAACCCACAAAATACAAAGAGGTTTGCAAGGTGTGT  
 SPM-A28C (125) -----  
  
 1760  
 KM360184 (1681) TCGTTGCTGCCTGACTTCAAGCAGTTCCCGTATGGTGACCTGTCTTTAGTGGGAGAACGAGGAGTGTCCCTGTCAGGTGG  
 SPM-8 (1417) TCGTTGCTGCCTGACTTCAAGCAGTTCCCGTATGGTGACCTGTCTTTAGTGGGAGAACGAGGAGTGTCCCTGTCAGGTGG  
 SPM-16 (1417) TCGTTGCTGCCTGACTTCAAGCAGTTCCCGTATGGTGACCTGTCTTTAGTGGGAGAACGAGGAGTGTCCCTGTCAGGTGG  
 SPM-B1 (1417) TCGTTGCTGCCTGACTTCAAGCAGTTCCCGTATGGTGACCTGTCTTTAGTGGGAGAACGAGGAGTGTCCCTGTCAGGTGG  
 SPM-A28C (125) -----  
  
 KM360184 (1761) TCAAAGAGCCAGGATCAATTTGGCTAGAGCAATTTATCGTGAGGCCGACATTTACTTGCTGGATGATCCCCCTATCTGCAG  
 SPM-8 (1497) TCAAAGAGCCAGGATCAATTTGGCTAGAGCAATTTATCGTGAGGCCGACATTTACTTGCTGGATGATCCCCCTATCTGCAG  
 SPM-16 (1497) TCAAAGAGCCAGGATCAATTTGGCTAGAGCAATTTATCGTGAGGCCGACATTTACTTGCTGGATGATCCCCCTATCTGCAG  
 SPM-B1 (1497) TCAAAGAGCCAGGATCAATTTGGCTAGAGCAATTTATCGTGAGGCCGACATTTACTTGCTGGATGATCCCCCTATCTGCAG  
 SPM-A28C (125) -----  
  
 KM360184 (1841) TGGACGCTAATGTAGGCAGACAACCTGTTTGATGGCTGCATCAAAGGCTACCTCACTGGACGAACTTGCGTCTTGGTCACC  
 SPM-8 (1577) TGGACGCTAATGTAGGCAGACAACCTGTTTGATGGCTGCATCAAAGGCTACCTCACTGGACGAACTTGCGTCTTGGTCACC  
 SPM-16 (1577) TGGACGCTAATGTAGGCAGACAACCTGTTTGATGGCTGCATCAAAGGCTACCTCACTGGACGAACTTGCGTCTTGGTCACC

|          |        |                                                                                    |
|----------|--------|------------------------------------------------------------------------------------|
| SPM-B1   | (1577) | TGGACGCTAATGTAGGCAGACAACTGTTTGATGGCTGCATCAAAGGCTACCTCACTGGACGAACTTGCGTCTTGGTCACC   |
| SPM-A28C | (125)  | -----                                                                              |
|          |        |                                                                                    |
| KM360184 | (1921) | CATCAGATCCATTACCTCAAAGCTGCTGATTTTATTGTAGTCCTTAATGAGGGTTCCGTCGAGAATATGGGCACTTATGA   |
| SPM-8    | (1657) | CATCAGATCCATTACCTCAAAGCTGCTGATTTTATTGTAGTCCTTAATGAGGGTTCCGTCGAGAATATGGGCACTTATGA   |
| SPM-16   | (1657) | CATCAGATCCATTACCTCAAAGCTGCTGATTTTATTGTAGTCCTTAATGAGGGTTCCGTCGAGAATATGGGCACTTATGA   |
| SPM-B1   | (1657) | CATCAGATCCATTACCTCAAAGCTGCTGATTTTATTGTAGTCCTTAATGAGGGTTCCGTCGAGAATATGGGCACTTATGA   |
| SPM-A28C | (125)  | -----                                                                              |
|          |        |                                                                                    |
| KM360184 | (2001) | TGAGCTGGTGAAGACAGGAAGCTGAATTCTCGATGCTGCTATCCAACCAAGAAAATGACGCAACTGAAAACGAAAAGAAAG  |
| SPM-8    | (1737) | TGAGCTGGTGAAGACAGGAAGCTGAATTCTCGATGCTGCTATCCAACCAAGAAAATGACGCAACTGAAAACGAAAAGAAAG  |
| SPM-16   | (1737) | TGAGCTGGTGAAGACAGGAAGCTGAATTCTCGATGCTGCTATCCAACCAAGAAAATGACGCAACTGAAAACGAAAAGAAAG  |
| SPM-B1   | (1737) | TGAGCTGGTGAAGACAGGAAGCTGAATTCTCGATGCTGCTATCCAACCAAGAAAATGACGCAACTGAAAACGAAAAGAAAG  |
| SPM-A28C | (125)  | -----                                                                              |
|          |        |                                                                                    |
| KM360184 | (2081) | ACCGACCAGCAATGATGCGAGGAATATCAAAAAATCTCAGTTAAGAGCGACACCGAAATGGAACAGAAGGCTCAAATACAG  |
| SPM-8    | (1817) | ACCGACCAGCAATGATGCGAGGAATATCAAAAAATCTCAGTTAAGAGCGACACCGAAATGGAACAGAAGGCTCAAATACAG  |
| SPM-16   | (1817) | ACCGACCAGCAATGATGCGAGGAATATCAAAAAATCTCAGTTAAGAGCGACACCGAAATGGAACAGAAGGCTCAAATACAG  |
| SPM-B1   | (1817) | ACCGACCAGCAATGATGCGAGGAATATCAAAAAATCTCAGTTAAGAGCGACACCGAAATGGAACAGAAGGCTCAAATACAG  |
| SPM-A28C | (125)  | -----                                                                              |
|          |        |                                                                                    |
| KM360184 | (2161) | GAGGCAGAGGAGAGAGCGACAGGTAGCTTGAAGTTTGAGGTGGTGCTCAAGTACCTGAGCTCCGTCCAGTCCCTGGTGTCT  |
| SPM-8    | (1897) | GAGGCAGAGGAGAGAGCGACAGGTAGCTTGAAGTTTGAGGTGGTGCTCAAGTACCTGAGCTCCGTCCAGTCCCTGGTGTCT  |
| SPM-16   | (1897) | GAGGCAGAGGAGAGAGCGACAGGTAGCTTGAAGTTTGAGGTGGTGCTCAAGTACCTGAGCTCCGTCCAGTCCCTGGTGTCT  |
| SPM-B1   | (1897) | GAGGCAGAGGAGAGAGCGACAGGTAGCTTGAAGTTTGAGGTGGTGCTCAAGTACCTGAGCTCCGTCCAGTCCCTGGTGTCT  |
| SPM-A28C | (125)  | -----                                                                              |
|          |        |                                                                                    |
| KM360184 | (2241) | GGTGTTTACGGCGTTCCCTTGACTGCTGATCACGCAAGGTGCTGCCACCACCTGCCGACTATTGGTTGAGTTTCTGGACTA  |
| SPM-8    | (1977) | GGTGTTTACGGCGTTCCCTTGACTGCTGATCACGCAAGGTGCTGCCACCACCTGCCGACTATTGGTTGAGTTTCTGGACTA  |
| SPM-16   | (1977) | GGTGTTTACGGCGTTCCCTTGACTGCTGATCACGCAAGGTGCTGCCACCACCTGCCGACTATTGGTTGAGTTTCTGGACTA  |
| SPM-B1   | (1977) | GGTGTTTACGGCGTTCCCTTGACTGCTGATCACGCAAG                                             |
| SPM-A28C | (125)  | -----ACACCGACTATTGGTTGAGTTTCTGGACTA                                                |
|          |        |                                                                                    |
| KM360184 | (2321) | ACCAAGTATGATTCTTATGAACAATCTTTACCTGAAGGCGTGGATCCAGATACTGACATGAACGCACAAATTGGCTTACTT  |
| SPM-8    | (2057) | ACCAAGTGGATTCTTATGAACAATCTTTACCTGAAGGCGTGGATCCAGATACTGACATGAACGCACAAATTGGCTTACTT   |
| SPM-16   | (2057) | ACCAAGTGGATTCTTATGAACAATCTTTACCTGAAGGCGTGGATCCAGATACTGACATGAACGCACAAATTGGCTTACTT   |
| SPM-B1   | (2018) | -----                                                                              |
| SPM-A28C | (155)  | ACCAAGTGGATTCTTATGAACAATCTTTACCTGAAGGCGTGGATCCAGATACTGACATGAACGCACAAATTGGCTTACTT   |
|          |        |                                                                                    |
| KM360184 | (2401) | ACAACCTGCTCAGTACCTATACGTTTTTCGGTGGAGTTATATTGGCTTTAATAGTCATGACCCTCGTCAGAATCACAGCTTT |
| SPM-8    | (2137) | ACAACCTGCCCAGTACCTATACGTTTTTCGGTGGAGTTATATTGGCTTTAATAGTCATGACCCTCGTCAGAATCACAGCTTT |
| SPM-16   | (2137) | ACAACCTGCCCAGTACCTATACGTTTTTCGGTGGAGTTATATTGGCTTTAATAGTCATGACCCTCGTCAGAATCACAGCTTT |
| SPM-B1   | (2018) | -----                                                                              |
| SPM-A28C | (235)  | ACAACCTGCCCAGTACCTATACGTTTTTCGGTGGAGTTATATTGGCTTTAATAGTCATGACCCTCGTCAGAATCACAGCTTT |
|          |        |                                                                                    |
| KM360184 | (2481) | CGTAGCGATGACAATGCGAGCTTCTCAAATCTTCACAACACTATTTACGAAAAATTAATTGTGACAGTAATGAGATTTT    |
| SPM-8    | (2217) | CGTAGCGATGACAATGCGAGCTTCTCAAATCTTCACAACACTATTTACGAAAAATTAATTGTGACAGTAATGAGATTTT    |
| SPM-16   | (2217) | CGTAGCGATGACAATGCGAGCTTCTCAAATCTTCACAACACTATTTACGAAAAATTAATTGTGACAGTAATGAGATTTT    |
| SPM-B1   | (2018) | -----                                                                              |
| SPM-A28C | (315)  | CGTAGCGATGACAATGCGAGCTTCTCAAATCTTCACAACACTATTTACGAAAAATTAATTGTGACAGTAATGAGATTTT    |
|          |        |                                                                                    |
| KM360184 | (2561) | TCGATACCAATCCTTCTGGTCGTGTGCTGAACAGATTCTCAAAGACATGGGTGCCATGGATGAGCTTCTTCCTCGCAGT    |
| SPM-8    | (2297) | TCGATACCAATCCTTCTGGTCGTGTGCTGAACAGATTCTCAAAGACATGGGTGCCATGGATGAGCTTCTTCCTCGCAGT    |
| SPM-16   | (2297) | TCGATACCAATCCTTCTGGTCGTGTGCTGAACAGATTCTCAAAGACATGGGTGCCATGGATGAGCTTCTTCCTCGCAGT    |
| SPM-B1   | (2018) | -----                                                                              |
| SPM-A28C | (395)  | TCGATACCAATCCTTCTGGTCGTGTGCTGAACAGATTCTCAAAGACATGGGTGCCATGGATGAGCTTCTTCCTCGCAGT    |
|          |        |                                                                                    |
| KM360184 | (2641) | CTTTTAGAAACAGTTCAGATGTATTTGTCGCTGACCAGTGTGTTGGTGCTGAACGCCACTGCATTGCCCTGGACGCTTAT   |
| SPM-8    | (2377) | CTTTTAGAAACAGTTCAGATGTATTTGTCGCTGACCAGTGTGTTGGTGCTGAACGCCACTGCATTGCCCTGGACGCTTAT   |
| SPM-16   | (2377) | CTTTTAGAAACAGTTCAGATGTATTTGTCGCTGACCAGTGTGTTGGTGCTGAACGCCACTGCATTGCCCTGGACGCTTAT   |
| SPM-B1   | (2018) | -----                                                                              |
| SPM-A28C | (475)  | CTTTTAGAAACAGTTCAGATGTATTTGTCGCTGACCAGTGTGTTGGTGCTGAACGCCACTGCATTGCCCTGGACGCTTAT   |
|          |        |                                                                                    |
| KM360184 | (2721) | ACCTACCTCCGTGTTGATTGTCATCTTCGTGCTCATGTTGAGATGGTACCTGAATACAGCTCAGGCTGTCAAACGTTTGG   |
| SPM-8    | (2457) | ACCTACCTCCGTGTTGATTGTCATCTTCGTGCTCATGTTGAGATGGTACCTGAATACAGCTCAGGCTGTCAAACGTTTGG   |
| SPM-16   | (2457) | ACCTACCTCCGTGTTGATTGTCATCTTCGTGCTCATGTTGAGATGGTACCTGAATACAGCTCAGGCTGTCAAACGTTTGG   |
| SPM-B1   | (2018) | -----                                                                              |
| SPM-A28C | (555)  | ACCTACCTCCGTGTTGATTGTCATCTTCGTGCTCATGTTGAGATGGTACCTGAATACAGCTCAGGCTGTCAAACGTTTGG   |
|          |        |                                                                                    |
| KM360184 | (2801) | AGGGCACAACCAAGAGTCCTGTATTTGGAATGATTAACCTCCACTATTTCTGGACTCTCCACTATTAGAAGTTCGGGTTC   |
| SPM-8    | (2537) | AGGGCACAACCAAGAGTCCTGTATTTGGAATGATTAACCTCCACTATTTCTGGACTCTCCACTATTAGAAGTTCGGGTTC   |



|          |        |                                                                                    |
|----------|--------|------------------------------------------------------------------------------------|
| SPM-16   | (2537) | AGGGCACAACCAAGAGTCTGTATTTGGAATGATTAACCTCCACTATTTCTGGACTCTCCACTATTAGAAGTTCGGGTTC    |
| SPM-B1   | (2018) | -----                                                                              |
| SPM-A28C | (635)  | AGGGCACAACCAAGAGTCTGTATTTGGAATGATTAACCTCCACTATTTCTGGACTCTCCACTATTAGAAGTTCGGGTTC    |
| KM360184 | (2881) | CAGGATAGACAGATGAAATTGTTTGACGAAGCGCAGAATCTCCACACAAGTGCTTTCCACACATTCTTCGGCGGTTCTAC   |
| SPM-8    | (2617) | CAGGATAGACAGATGAAATTGTTTGACGAAGCGCAGAATCTCCACACAAGTGCTTTCCACACATTCTTCGGCGGTTCTAC   |
| SPM-16   | (2617) | CAGGATAGACAGATGAAATTGTTTGACGAAGCGCAGAATCTCCACACAAGTGCTTTCCACACATTCTTCGGCGGTTCTAC   |
| SPM-B1   | (2018) | -----                                                                              |
| SPM-A28C | (715)  | CAGGATAGACAGATGAAATTGTTTGACGAAGCGCAGAATCTCCACACAAGTGCTTTCCACACATTCTTCGGCGGTTCTAC   |
| KM360184 | (2961) | GGCATTTCGATTGTATCTCGATACTTTGTGTTTGACCTACCTCGGTGTCGTCATGTCAATTTTCATTTTGGGCGACTTTG   |
| SPM-8    | (2697) | GGCATTTCGATTGTATCTCGATACTTTGTGTTTGACCTACCTCGGTGTCGTCATGTCAATTTTCATTTTGGGCGACTTTG   |
| SPM-16   | (2697) | GGCATTTCGATTGTATCTCGATACTTTGTGTTTGACCTACCTCGGTGTCGTCATGTCAATTTTCATTTTGGGCGACTTTG   |
| SPM-B1   | (2018) | -----                                                                              |
| SPM-A28C | (795)  | GGCATTTCGATTGTATCTCGATACTTTGTGTTTGACCTACCTCGGTGTCGTCATGTCAATTTTCATTTTGGGCGACTTTG   |
| KM360184 | (3041) | GTGATTTCGATCCCGGTGGGAAGTGTCCGCTCTGGCTGTCTGTCAGTCCATGGTGCTGACCATGATGTTGCAGATGGCAGCT |
| SPM-8    | (2777) | GTGATTTCGATCCCGGTGGGAAGTGTCCGCTCTGGCTGTCTGTCAGTCCATGGTGCTGACCATGATGTTGCAGATGGCAGCT |
| SPM-16   | (2777) | GTGATTTCGATCCCGGTGGGAAGTGTCCGCTCTGGCTGTCTGTCAGTCCATGGTGCTGACCATGATGTTGCAGATGGCAGCT |
| SPM-B1   | (2018) | GTCTTTTCGATCCCGGTGGGAAGTGTCCGCTCTGGCTGTCTGTCAGTCCATGGTGCTGACCATGATGTTGCAGATGGCATT  |
| SPM-A28C | (875)  | GTGATTTCGATCCCGGTGGGAAGTGTCCGCTCTGGCTGTCTGTCAGTCCATGGTGCTGACCATGATGTTGCAGATGGCAGCT |
| KM360184 | (3121) | AGGTTCACAGCTGACTTTTTTGGGGCAAATGACGGCTGTGGAGAGAGTTCTGGAATACACCAAGCTACCCACGGAGACCAA  |
| SPM-8    | (2857) | AGGTTCACAGCTGACTTTTTTGGGGCAAATGACGGCTGTGGAGAGAGTTCTGGAATACACCAAGCTACCCACGGAGACCAA  |
| SPM-16   | (2857) | AGGTTCACAGCTGACTTTTTTGGGGCAAATGACGGCTGTGGAGAGAGTTCTGGAATACACCAAGCTACCCACGGAGACCAA  |
| SPM-B1   | (2095) | AGGTTCACAGCTGACTTTTTTGGGGCAAATGACGGCTGTGGAGAGAGTTCTGGAATACACCAAGCTACCCACGGAGACCAA  |
| SPM-A28C | (955)  | AGGTTCACAGCTGACTTTTTTGGGGCAAATGACGGCTGTGGAGAGAGTTCTGGAATACACCAAGCTACCCACGGAGACCAA  |
| KM360184 | (3201) | TATGGAGCAAGGACCAACTAACCACCAAAGGAATGGCCAGTGCTGGTAGAGTGACGTTCTCAAATGTGTACCTGAATT     |
| SPM-8    | (2937) | TATGGAGCAAGGACCAACTAACCACCAAAGGAATGGCCAGTGCTGGTAGAGTGACGTTCTCAAATGTGTACCTGAATT     |
| SPM-16   | (2937) | TATGGAGCAAGGACCAACTAACCACCAAAGGAATGGCCAGTGCTGGTAGAGTGACGTTCTCAAATGTGTACCTGAATT     |
| SPM-B1   | (2168) | ---GGAGCAAGGAC-----GAATGGCCAGTGCTGGTAGAGTGACGTTCTCAAATGTGTACCTGAATT                |
| SPM-A28C | (1035) | TATGGAGCAAGGACCAACTAACCACCAAAGGAATGGCCAGTGCTGGTAGAGTGACGTTCTCAAATGTGTACCTGAATT     |
| KM360184 | (3281) | ATTCCATGGAAGACCCGCCGGTGCTGAAGGACTTAAACTTTGAAATTCAAAGCGGCTGGAAGGTTGGAGTTGTAGGCAGA   |
| SPM-8    | (3017) | ATTCCATGGAAGACCCGCCGGTGCTGAAGGACTTAAACTTTGAAATTCAAAGCGGCTGGAAGGTTGGAGTTGTAGGCAGA   |
| SPM-16   | (3017) | ATTCCATGGAAGACCCGCCGGTGCTGAAGGACTTAAACTTTGAAATTCAAAGCGGCTGGAAGGTTGGAGTTGTAGGCAGA   |
| SPM-B1   | (2228) | ATTCCATGGAAGACCCGCCGGTGCTGAAGGACTTAAACTTTGAAATTCAAAGCGGCTGGAAGGTTGGAGTTGTAGGCAGA   |
| SPM-A28C | (1115) | ATTCCATGGAAGACCCGCCGGTGCTGAAGGACTTAAACTTTGAAATTCAAAGCGGCTGGAAGGTTGGAGTTGTAGGCAGA   |
| KM360184 | (3361) | ACAGGAGCCGGCAAGTCATCGCTCA-----TCGCGGCTTTGTTCCGGCTTAGTGACATAAGCGGC                  |
| SPM-8    | (3097) | ACAGGAGCCGGCAAGTCATCGCTC-----TCGCGGCTTTGTTCCGGCTTAGTGACATAAGCGGC                   |
| SPM-16   | (3097) | ACAGGAGCCGGCAAGTCATCGCTCA-----TCGCGGCTTTGTTCCGGCTTAGTGACATAAGCGGC                  |
| SPM-B1   | (2308) | ACAGGAGCCGGCAAGTCATCGCTCA-----TCGCGGCTTTGTTCCGGCTTAGTGACATAAGCGGC                  |
| SPM-A28C | (1195) | ACAGGAGCCGGCAAGTCATCGCTCACGGCTTTGTTCTCTTTGTTCTCGCGGCTTTGTTCCGGCTTAGTGACATAAGCGGC   |
| KM360184 | (3421) | AGCATCAAAATTGACGGTGTGGACACCGAAGGATTAGCCAAAAAGACTTTGAGATCGAAAATATCAATTATTCCACAAGA   |
| SPM-8    | (3121) | -----                                                                              |
| SPM-16   | (3133) | GTTG----ATATACG-GTTAAAC-----ATTGTTAGGAAAACTTTGAGATCGAAAATATCAATTATTCCACAAGA        |
| SPM-B1   | (2368) | AGCATCAAAATTGACGGTGTGGACACCGAAGGATTAGCCAAAAAGACTTTGAGATCGAAAATATCAATTATTCCACAAGA   |
| SPM-A28C | (1275) | AGCATCAAAATTGACGGTGTGGACACCGAAGGATTAGCCAAAAAGACTTTGAGATCGAAAATATCAATTATTCCACAAGA   |
| KM360184 | (3501) | GCCGGTGCTGTTCTCGGCTACTCTGCGATACAATTTGGACCCGTTTCGACGATTACAGCGACGACGATATTT----GGAGG  |
| SPM-8    | (3121) | -----GAGG                                                                          |
| SPM-16   | (3201) | GCCGGTGCTGTTCTCGGCTACTCTGCGATACAATTTGGACCCGTTTCGACGATTACAGCGACGACGATATTTATATGGAGG  |
| SPM-B1   | (2448) | GCCGGTGCTGTTCTCGGCTACTCTGCGATACAATTTGGACCCGTTTCGACGATTACAGCGACGACGATATTT----GGAGG  |
| SPM-A28C | (1355) | GCCGGTGCTGTTCTCGGCTACTCTGCGATACAATTTGGACCCGTTTCGACGATTACAGCGACGACGATATTT----GGAGG  |
| KM360184 | (3577) | GCGTTGGAACAGGTGGAATTAAGAAGGAATACCGGCTTTAGACTTTAAGGTCGCTGAAGGTGGTACTAACTTCTCTAT     |
| SPM-8    | (3125) | GCGTTGGAACAGGTGGAATTAAGAAGGAATACCGGCTTTAGACTTTAAGGTCGCTGAAGGTGGTACTAACTTCTCTAT     |
| SPM-16   | (3281) | GCGTTGGAACAGGTGGAATTAAGAAGGAATACCGGCTTTAGACTTTAAGGTCGCTGAAGGTGGTACTAACTTCTCTAT     |
| SPM-B1   | (2524) | GCGTTGGAACAGGTGGAATTAAGAAGGAATACCGGCTTTAGACTTTAAGGTCGCTGAAGGTGGTACTAACTTCTCTAT     |
| SPM-A28C | (1431) | GCGTTGGAACAGGTGGAATTAAGAAGGAATACCGGCTTTAGACTTTAAGGTCGCTGAAGGTGGTACTAACTTCTCTAT     |
| KM360184 | (3657) | GGGACAACGTCAGTTGGTTTGCTTGGCTCGTGCCATTCTACGCTCTAACAAAAATACTCATCATGGACGAAGCTACCGCTA  |
| SPM-8    | (3205) | GGGACAACGTCAGTTGGTTTGCTTGGCTCGTGCCATTCTACGCTCTAACAAAAATACTCATCATGGACGAAGCTACCGCTA  |
| SPM-16   | (3361) | GGGACAACGTCAGTTGGTTTGCTTGGCTCGTGCCATTCTACGCTCTAACAAAAATACTCATCATGGACGAAGCTACCGCTA  |
| SPM-B1   | (2604) | GGGACAACGTCAGTTGGTTTGCTTGGCTCGTGCCATTCTACGCTCTAACAAAAATACTCATCATGGACGAAGCTACCGCTA  |
| SPM-A28C | (1511) | GGGACAACGTCAGTTGGTTTGCTTGGCTCGTGCCATTCTACGCTCTAACAAAAATACTCATCATGGACGAAGCTACCGCTA  |
| KM360184 | (3737) | ACGTCGATCCTCAGACGGACGCTTTGATCCAAAAGACGATCCGTCGTCAGTTTGCGTCGTGCACGGTGCTCACCATCGCG   |

|          |        |                                                                                  |
|----------|--------|----------------------------------------------------------------------------------|
| SPM-8    | (3285) | ACGTCGATCCTCAGACGGACGCTTTGATCCAAAAGACGATCCGTCGTCAGTTTGCGTCGTGCACGGTGCTCACCATCGCG |
| SPM-16   | (3441) | ACGTCGATCCTCAGACGGACGCTTTGATCCAAAAGACGATCCGTCGTCAGTTTGCGTCGTGCACGGTGCTCACCATCGCG |
| SPM-B1   | (2684) | ACGTCGATCCTCAGACGGACGCTTTGATCCAAAAGACGATCCGTCGTCAGTTTGCGTCGTGCACGGTGCTCACCATCGCG |
| SPM-A28C | (1521) | ACGTCGATCCTCAGACGGACGCTTTGATCCAAAAGACGATCCGTCGTCAGTTTGCGTCGTGCACGGTGCTCACCATCGCG |
|          |        |                                                                                  |
| KM360184 | (3817) | CATCGACTGAACACCATCATGGACTCCGACCGAGTGCTGGTCATGGACCAGGGCGAAGTGGCCGAGTTCGACCATCCCCA |
| SPM-8    | (3365) | CATCGACTGAACACCATCATGGACTCCGACCGAGTGCTGGTCATGGACCAGGGCGAAGTGGCCGAGTTCGACCATCCCCA |
| SPM-16   | (3521) | CATCGACTGAACACCATCATGGACTCCGACCGAGTGCTGGTCATGGACCAGGGCGAAGTGGCCGAGTTCGACCATCCCCA |
| SPM-B1   | (2764) | CATCGACTGAACACCATCATGGACTCCGACCGAGTGCTGGTCATGGACCAGGGCGAAGTGGCCGAGTTCGACCATCCCCA |
| SPM-A28C | (1521) | CATCGACTGAACACCATCATGGACTCCGACCGAGTGCTGGTCATGGACCAGGGCGAAGTGGCCGAGTTCGACCATCCCCA |
|          |        |                                                                                  |
| KM360184 | (3897) | CATCTTGCTCAGCAACCCCAATAGCAAGTTCTTCTCTATGGTCCGAGAGACAGGAGAAAGCATGACAAGGACCTTAATGG |
| SPM-8    | (3445) | CATCTTGCTCAGCAACCCCAATAGCAAGTTCTTCTCTATGGTCCGAGAGACAGGAGAAAGCATGACAAGGACCTTAATGG |
| SPM-16   | (3601) | CATCTTGCTCAGCAACCCCAATAGCAAGTTCTTCTCTATGGTCCGAGAGACAGGAGAAAGCATGACAAGGACCTTAATGG |
| SPM-B1   | (2844) | CATCTTGCTCAGCAACCCCAATAGCAAGTTCTTCTCTATGGTCCGAGAGACAGGAGAAAGCATGACAAGGACCTTAATGG |
| SPM-A28C | (1521) | CATCTTGCTCAGCAACCCCAATAGCAAGTTCTTCTCTATGGTCCGAGAGACAGGAGAAAGCATGACAAGGACCTTAATGG |
|          |        |                                                                                  |
| KM360184 | (3977) | AGGTCGCTAAGGC CAAATATGATAGTGATAATAAGGAAGCTTAA                                    |
| SPM-8    | (3525) | AGGTCGCTAAGGC-----                                                               |
| SPM-16   | (3681) | AGGTCGCTAAGGC-----                                                               |
| SPM-B1   | (2924) | AGGTCGCTAAGGC-----                                                               |
| SPM-A28C | (1521) | AGGTCGCTAAGGC-----                                                               |

Figure S5. Alignment of partial mRNA sequences of *Helicoverpa zea* ATP binding cassette transporter subfamily C2 (*ABCC2*) from knockout lines SPM-8, SPM-16, SPM-B1, and SPM-A28C with *H. zea* *ABCC2* mRNA sequence KM360184 from GenBank. Identical nucleotides are shown in white text with black background and alignment gaps are indicated by hyphens.

|          |       |                                                                                          |
|----------|-------|------------------------------------------------------------------------------------------|
| KM360184 | (1)   | MGVENKNNVQNAEGPARKTYKKPNILSRIFLWWMCPVLITHFNKRNVEESDLIPPSNLYNSERQGEYLERYWLAEIENAT         |
| SPM-8    | (1)   | -----                                                                                    |
| SPM-16   | (1)   | -----                                                                                    |
| SPM-B1   | (1)   | -----                                                                                    |
| SPM-A28C | (1)   | -----                                                                                    |
|          |       |                                                                                          |
| KM360184 | (81)  | IENREPSLWKALRKAYWVSYPGAIFII IQSAARTYQPLLFSQLLSYWSVDSEMTQQDAGLYALAMLGLNFVSMQCQHHN         |
| SPM-8    | (1)   | -----WKALRKAYWVSYPGAIFII IQSAARTYQPLLFSQLLSYWSVDSEMTQQDAGLYALAMLGLNFVSMQCQHHN            |
| SPM-16   | (1)   | -----WKALRKAYWVSYPGAIFII IQSAARTYQPLLFSQLLSYWSVDSEMTQQDAGLYALAMLGLNFVSMQCQHHN            |
| SPM-B1   | (1)   | -----WKALRKAYWVSYPGAIFII IQSAARTYQPLLFSQLLSYWSVDSEMTQQDAGLYALAMLGLNFVSMQCQHHN            |
| SPM-A28C | (1)   | -----WKALRKAYWVSYPGAIFII IQSAARTYQPLLFSQLLSY-----                                        |
|          |       |                                                                                          |
| KM360184 | (161) | TLFVMRFSCLKVKVACSSLLYRKLLRMTQVSVGEVAGGKLVNLLSNDITRFDYAFMFLHYLWIVPIQVAVVLYFLWEAAGF        |
| SPM-8    | (73)  | TLFVMRFSCLKVKVACSSLLYRKLLRMTQVSVGEVAGGKLVNLLSNDITRFDYAFMFLHYLWIVPIQVAVVLYFLWEAAGF        |
| SPM-16   | (73)  | TLFVMRFSCLKVKVACSSLLYRKLLRMTQVSVGEVAGGKLVNLLSNDITRFDYAFMFLHYLWIVPIQVAVVLYFLWEAAGF        |
| SPM-B1   | (73)  | TLFVMRFSCLKVKVACSSLLYRKLLRMTQVSVGEVAGGKLVNLLSNDITRFDYAFMFLHYLWIVPIQVAVVLYFLWEAAGF        |
| SPM-A28C | (40)  | -----                                                                                    |
|          |       |                                                                                          |
| KM360184 | (241) | APFVGLFGVVILILPLQAGLTKLTTVVRRETAKRTDRRIKLMSEIIGGIQVIKMYAWEKPFQLVVKAARAFEMSALRKSI         |
| SPM-8    | (153) | APFVGLFGVVILILPLQAGLTKLTTVVRRETAKRTDRRIKLMSEIIGGIQVIKMYAWEKPFQLVVKAARAFEMSALRKSI         |
| SPM-16   | (153) | APFVGLFGVVILILPLQAGLTKLTTVVRRETAKRTDRRIKLMSEIIGGIQVIKMYAWEKPFQLVVKAARAFEMSALRKSI         |
| SPM-B1   | (153) | APFVGLFGVVILILPLQAGLTKLTTVVRRETAKRTDRRIKLMSEIIGGIQVIKMYAWEKPFQLVVKAARAFEMSALRKSI         |
| SPM-A28C | (40)  | -----                                                                                    |
|          |       |                                                                                          |
| KM360184 | (321) | FIRSTFLGFMLFTERSIMFVTVLTLALTGTMITATTIYPIQQYFSIIQFNVTLIIPMAIASYSEMMVSIERIQGFLSLDE         |
| SPM-8    | (233) | FIRSTFLGFMLFTERSIMFVTVLTLALTGTMITATTIYPIQQYFSIIQFNVTLIIPMAIASYSEMMVSIERIQGFLSLDE         |
| SPM-16   | (233) | FIRSTFLGFMLFTERSIMFVTVLTLALTGTMITATTIYPIQQYFSIIQFNVTLIIPMAIASYSEMMVSIERIQGFLSLDE         |
| SPM-B1   | (233) | FIRSTFLGFMLFTERSIMFVTVLTLALTGTMITATTIYPIQQYFSIIQFNVTLIIPMAIASYSEMMVSIERIQGFLSLDE         |
| SPM-A28C | (40)  | -----                                                                                    |
|          |       |                                                                                          |
| KM360184 | (401) | RSDMQVTPKINGSNNTLTFKSKKSPLEVGIVPKKYPSEVMAAKEMQDDPTQMDYPIRLNKVSASWTGSNSSEMTLKNI           |
| SPM-8    | (313) | RSDMQVTPKINGSNNTLTFKSKKSPLEVGIVPKKYPSEVMAAKEMQDDPTQMDYPIRLNKVSASWTGSNSSEMTLKNI           |
| SPM-16   | (313) | RSDMQVTPKINGSNNTLTFKSKKSPLEVGIVPKKYPSEVMAAKEMQDDPTQMDYPIRLNKVSASWTGSNSSEMTLKNI           |
| SPM-B1   | (313) | RSDMQVTPKINGSNNTLTFKSKKSPLEVGIVPKKYPSEVMAAKEMQDDPTQMDYPIRLNKVSASWTGSNSSEMTLKNI           |
| SPM-A28C | (40)  | -----                                                                                    |
|          |       |                                                                                          |
| KM360184 | (481) | SLRIRK GKLC AII GPVGS GKTSL LQ LLLKELPLNSGTL DVS GKMSYACQESWLFPGTVRENILFGLTYEPTKYKEVCKVC |
| SPM-8    | (393) | SLRIRK GKLC AII GPVGS GKTSL LQ LLLKELPLNSGTL DVS GKMSYACQESWLFPGTVRENILFGLTYEPTKYKEVCKVC |
| SPM-16   | (393) | SLRIRK GKLC AII GPVGS GKTSL LQ LLLKELPLNSGTL DVS GKMSYACQESWLFPGTVRENILFGLTYEPTKYKEVCKVC |
| SPM-B1   | (393) | SLRIRK GKLC AII GPVGS GKTSL LQ LLLKELPLNSGTL DVS GKMSYACQESWLFPGTVRENILFGLTYEPTKYKEVCKVC |
| SPM-A28C | (40)  | -----                                                                                    |
|          |       |                                                                                          |
| KM360184 | (561) | SLLPDFKQFPYGDL SLVGERGVSLSGGQ RARINLARA IYREADIYLLDDPLSAVDANVGRQLFDGCIKGYLTGRTCVLVT      |
| SPM-8    | (473) | SLLPDFKQFPYGDL SLVGERGVSLSGGQ RARINLARA IYREADIYLLDDPLSAVDANVGRQLFDGCIKGYLTGRTCVLVT      |
| SPM-16   | (473) | SLLPDFKQFPYGDL SLVGERGVSLSGGQ RARINLARA IYREADIYLLDDPLSAVDANVGRQLFDGCIKGYLTGRTCVLVT      |
| SPM-B1   | (473) | SLLPDFKQFPYGDL SLVGERGVSLSGGQ RARINLARA IYREADIYLLDDPLSAVDANVGRQLFDGCIKGYLTGRTCVLVT      |
| SPM-A28C | (40)  | -----                                                                                    |
|          |       |                                                                                          |
| KM360184 | (641) | HQIHYLKAADFIVVLNEGSVENMGTYDELVKTGTEFSMLLSNQENDATENEKKDRPAMMRGISKISVKSDTEMEQKAQIQ         |
| SPM-8    | (553) | HQIHYLKAADFIVVLNEGSVENMGTYDELVKTGTEFSMLLSNQENDATENEKKDRPAMMRGISKISVKSDTEMEQKAQIQ         |
| SPM-16   | (553) | HQIHYLKAADFIVVLNEGSVENMGTYDELVKTGTEFSMLLSNQENDATENEKKDRPAMMRGISKISVKSDTEMEQKAQIQ         |
| SPM-B1   | (553) | HQIHYLKAADFIVVLNEGSVENMGTYDELVKTGTEFSMLLSNQENDATENEKKDRPAMMRGISKISVKSDTEMEQKAQIQ         |
| SPM-A28C | (40)  | -----                                                                                    |
|          |       |                                                                                          |
| KM360184 | (721) | EAEERATGSLKFEVV LKYLSSVQSWCLVFTAFVLVLLITQGAATTADYWLSFWTNQVDSYEQSLPEGVD PPTDMNAQIGLL      |
| SPM-8    | (633) | EAEERATGSLKFEVV LKYLSSVQSWCLVFTAFVLVLLITQGAATTADYWLSFWTNQVDSYEQSLPEGVD PPTDMNAQIGLL      |
| SPM-16   | (633) | EAEERATGSLKFEVV LKYLSSVQSWCLVFTAFVLVLLITQGAATTADYWLSFWTNQVDSYEQSLPEGVD PPTDMNAQIGLL      |
| SPM-B1   | (633) | EAEERATGSLKFEVV LKYLSSVQSWCLVFTAFVLVLLITQ-----                                           |
| SPM-A28C | (40)  | -----                                                                                    |
|          |       |                                                                                          |
| KM360184 | (801) | TTAQYLYVFGGVILALIVMTLVRITAFVAMTMRASQNLHNTIYEKLIVTVMRFFDTNP SGRVLNRF SKDMGAMDELLPRS       |
| SPM-8    | (713) | TTAQYLYVFGGVILALIVMTLVRITAFVAMTMRASQNLHNTIYEKLIVTVMRFFDTNP SGRVLNRF SKDMGAMDELLPRS       |
| SPM-16   | (713) | TTAQYLYVFGGVILALIVMTLVRITAFVAMTMRASQNLHNTIYEKLIVTVMRFFDTNP SGRVLNRF SKDMGAMDELLPRS       |
| SPM-B1   | (672) | -----                                                                                    |
| SPM-A28C | (40)  | -----                                                                                    |
|          |       |                                                                                          |
| KM360184 | (881) | LLETVQMYLSLTSVLVLNATALPWTLIPTSVLIVIFVLMRLRWYLN TAAQAVKRLEGTTKSPVFGMINSTISGLSTIRSSGS      |
| SPM-8    | (793) | LLETVQMYLSLTSVLVLNATALPWTLIPTSVLIVIFVLMRLRWYLN TAAQAVKRLEGTTKSPVFGMINSTISGLSTIRSSGS      |
| SPM-16   | (793) | LLETVQMYLSLTSVLVLNATALPWTLIPTSVLIVIFVLMRLRWYLN TAAQAVKRLEGTTKSPVFGMINSTISGLSTIRSSGS      |
| SPM-B1   | (672) | -----                                                                                    |
| SPM-A28C | (40)  | -----                                                                                    |

|          |        |                                                                                   |
|----------|--------|-----------------------------------------------------------------------------------|
| KM360184 | (961)  | QDRQMKLFDEAQNLTSAFHTFFGGSTAFALYLDTLCLTYLGVVMSIFILGDFGDLIPVGSVGLAVGQSMVLTMMLQMAA   |
| SPM-8    | (873)  | QDRQMKLFDEAQNLTSAFHTFFGGSTAFALYLDTLCLTYLGVVMSIFILGDFGDLIPVGSVGLAVSQSMVLTMMLQMAA   |
| SPM-16   | (873)  | QDRQMKLFDEAQNLTSAFHTFFGGSTAFALYLDTLCLTYLGVVMSIFILGDFGDLIPVGSVGLAVSQSMVLTMMLQMAA   |
| SPM-B1   | (672)  | -----GVLIIPVGSVGLAVSQSMVLTMMLQMAF                                                 |
| SPM-A28C | (40)   | -----                                                                             |
|          |        |                                                                                   |
| KM360184 | (1041) | RSITADFLGQMTAVERVLEYTKLPTETNMEQGPTNPPKEWPSAGRVTFNSVYLNYSMEDPPVLKDLNFEIQSGWKVGVVGR |
| SPM-8    | (953)  | RFTADFLGQMTAVERVLEYTKLPTETNMEQGPTNPPKEWPSAGRVTFNSVYLNYSMEDPPVLKDLNFEIQSGWKVGVVGR  |
| SPM-16   | (953)  | RFTADFLGQMTAVERVLEYTKLPTETNMEQGPTNPPKEWPSAGRVTFNSVYLNYSMEDPPVLKDLNFEIQSGWKVGVVGR  |
| SPM-B1   | (699)  | RFTADFLGQMTAVERVLENTQLPTGSKD-----EWPSAGRVTFNSVYLNYSMEDPPVLKDLNFEIQSGWKVGVVGR      |
| SPM-A28C | (40)   | -----                                                                             |
|          |        |                                                                                   |
| KM360184 | (1121) | TGACKSSLIAALFRLSDISGSIKIDGVDTEGLAKKTLRSKISIIIPQEPVLFSATLRYNLDPFDDYSDDDIWRALEQVELK |
| SPM-8    | (1033) | TGACKSSLEGVGTGGIKRRNTGFRL-----                                                    |
| SPM-16   | (1033) | TGACKSSHEIKYVDILVNTFVG-----KTLRSKISIIIPQEPVLFSATLRYNLDPFDDYSDDDIYMEGVGTGGI        |
| SPM-B1   | (770)  | TGACKSSLIAALFRLSDISGSIKIDGVDTEGLAKKTLRSKISIIIPQEPVLFSATLRYNLDPFDDYSDDDIWRALEQVELK |
| SPM-A28C | (40)   | -----                                                                             |
|          |        |                                                                                   |
| KM360184 | (1201) | EGIPALDFKVAEGGTNFSMGQRQLVCLARAILRSNKILIMDEATANVDPQTDALIQKTIRRFASCTVLTIAHRLNTIMD   |
| SPM-8    | (1058) | -----                                                                             |
| SPM-16   | (1101) | KRRNTGFRL-----                                                                    |
| SPM-B1   | (850)  | EGIPALDFKVAEGGTNFSMGQRQLVCLARAILRSNKILIMDEATANVDPQTDALIQKTIRRFASCTVLTIAHRLNTIMD   |
| SPM-A28C | (40)   | -----                                                                             |
|          |        |                                                                                   |
| KM360184 | (1281) | SDRVLVMDQGEVAEFDHPHILLSNPNSKFFSMVRETGESMTRTLM EVAKAKYDS DNKEA                     |
| SPM-8    | (1058) | -----                                                                             |
| SPM-16   | (1110) | -----                                                                             |
| SPM-B1   | (930)  | SDRVLVMDQGEVAEFDHPHILLSNPNSKFFSMVRETGESMTRTLM EVAK-----                           |
| SPM-A28C | (40)   | -----                                                                             |

Figure S6. Alignment of putative amino acid sequences predicted from partial mRNA sequences of *Helicoverpa zea* ATP binding cassette transporter subfamily C2 (ABCC2) gene knockout lines SPM-8, SPM-16, SPM-B1, and SPM-A28C with the ABCC2 amino acid sequence AKH49600 from GenBank. Identical amino acids are shown by white text in black background and alignment gaps are shown with a hyphen.

**A.**

|           |                              |                         |                              |
|-----------|------------------------------|-------------------------|------------------------------|
| KZ117297_ | AGTTTAGATAAGCTCAATAACTGTGTTA | CCACGGAGACCAATGAATCACAC | AGAAGAGACTAATGATAGATAGATAATA |
| WT        | AGTTTAGATAAGCTTAATAACTGTGTTA | CCACGGAGACCAATGAATCACAC | AGAAGAGACTAATGATAGATAGATAATA |
| SPM-28C   | AGTTTAGATAAGCTTAATAACTGTGTTA | CCACGGAGACCAATGAATCACAC | AGAAGAGACTAATGATAGATAGATAATA |
| SPM-B1    | AGTTTAGATAAGCTTAATAACTGTGTTA | CCACGGAGACCAATGAATCACAC | AGAAGAGACTAATGATAGATAGATAATA |

**B.**

|          |                              |                         |                              |
|----------|------------------------------|-------------------------|------------------------------|
| KZ117297 | CGAATGCGCACATAATTTTATATCTAAA | CCACGGAGAACAAAATTACTAGC | GGAGGTGCCATAGTGGAAAATCGCCTAA |
| WT       | CGAATGCGCACATAATTTTATATCTAAA | CCACGGAGAACTAAATTACTAGC | GGAGGTGCCATAGTGGAAAATCGCCTAA |
| SPM-28C  | CGAATGCGCACATAATTTTATATCTAAA | CCACGGAGAACAAAATTACTAGC | GGAGGTGCCATAGTGGAAAATCGCCTAA |
| SPM-B1   | CGAATGCGCACATAATTTTATATCTAAA | CCACGGAGAACAAAATTACTAGC | GGAGGTGCCATAGTGGAAAATCGCCTAA |

**C.**

|          |                              |                         |                              |
|----------|------------------------------|-------------------------|------------------------------|
| KZ117617 | GAATTTGATATTGACTTTTAAGCCCTCT | CCACGGAGACCAATAAGAGTAAG | ACACAGAGTAAGGAAAGATGAGTGGAGA |
| WT       | GAATTTGATATTGACTTTTAAGCCCTCT | CCACGGAGACCAATAAGAGTAAG | ACACAGAGTAAGGAAAGATGAGTGGAGA |
| SPM-28C  | GAATTTGATATTGACTTTTAAGCCCTCT | CCACGGAGACCAATAAGAGTAAG | ACACAGAGTAAGGAAAGATGAGTGGAGA |
| SPM-B1   | GAATTTGATATTGACTTTTAAGCCCTCT | CCACGGAGACCAATAAGAGTAAG | ACACAGAGTAAGGAAAGATGAGTGGAGA |

**D.**

|          |                              |                         |                              |
|----------|------------------------------|-------------------------|------------------------------|
| KZ118710 | CGCAATAGTATTTTTAAATAAATAAACG | CAATAACTAATAGTCGGCAGTGG | TTCGCTTGCTCCGTGTCTGGCACTTGGG |
| WT       | CGCAATAGTATTTTTAAATAAATAAACG | CAATAACTAATAGTCGGCAGTGG | TTCGCTTGCTCCGTGTCTGGCACTTGGG |
| SPM-28C  | CGCAATAGTATTTTTAAATAAATAAACG | CAATAACTAATAGTCGGCAGTGG | TTCGCTTGCTCCGTGTCTGGCACTTGGG |
| SPM-B1   | CGCAATAGTATTTTTAAATAAATAAACG | CAATAACTAATAGTCGGCAGTGG | TTCGCTTGCTCCGTGTCTGGCACTTGGG |

Figure S7. Alignment of nucleotide sequences from potential off-target sites for exon 13 and exon 19 sgRNA in *Helicoverpa zea* ATP binding cassette transporter subfamily C2 (ABCC2) knockout lines SPM-A28C and SPM-B1. Analysis of potential off-targets for sgRNA for exon 13 (5'-CTGCCGACTATTGGTTGAGT-3') and exon 19 (5'-TTGCTCCATATTGGTCTCCG-3') in *Helicoverpa zea* ABCC2 gene knockout lines SPM-A28C and SPM-B1. Off-targets for exon 19 sgRNA located in genomic scaffold KZ117297 were examined by amplifying genomic DNA from wild type insects and knockout lines using primers 4032 (5'-CTGAACACAAATGCGCAAATCG-3') and 4033 (5'-CGTGTTTACGACATGCCGAT-3') (A), and 4034 (5'-ACGCGTTTAATGAGTACAACCG-3') and 4035 (5'-ATGCAGTAGGTTAGGCGCCT-3') (B). Primer pair 4036 (5'-TTATGACTTGGTTGCCACAACC-3') and 4037 (5'-CGCCCTTATAGGTACGCCTT-3') was used to amplify the potential off-target site for exon 19 sgRNA located in *H. zea* genomic scaffold KZ1176187 (C). Primer pair 4038 (5'-CAGGTCCTAAATATTCATGCACC-3') and 4039 (5'-CATGGCCTTTGTTTGTGGAT-3') was used to amplify the potential off target site for exon 13 sgRNA located in the in the *H. zea* genomic scaffold KZ118710 (D). Identical nucleotides are shown in white text in black background and variations from the reference sequence are shown by black text. Potential off-target sequences and protospacer adjacent sequence (PAM) are marked by black text and red text in green background, respectively.

Table S1. Primer names and sequences used for PCR amplification and nucleotide sequencing of *Helicoverpa zea* ATP binding cassette transporter subfamily C2 (ABCC2) gene and off-target sites. The last letter of the name indicates the forward (F) or reverse (R) direction or the primer.

| Primer name           | Primer sequence          | purpose                    |
|-----------------------|--------------------------|----------------------------|
| 3099HzABC2_Ex15R      | GAAAGCTGTGATTCTGACGA     | PCR/Sequencing ABCC2       |
| 3104HzABC2_Ex19F      | GTGGGAAGTGTCTGGTCTGGC    | PCR/Sequencing ABCC2       |
| 3105HzABC2_Ex20F      | GGAAGACCCGCCGGTGCTGA     | PCR/Sequencing ABCC2       |
| 3771Hz_ABCC2_Ex21F    | TAGGTTGGAGTTGTAGGCAGAAC  | Sequencing ABCC2           |
| 3772Hz_ABCC2_Int21R   | AGGGATGCTAACGGATCATT     | Sequencing ABCC2           |
| 3776Hz_ABCC2_Ex23R    | CGGTAGCTTCGTCCATGATG     | Sequencing ABCC2           |
| 3790Hz_ABCC2_94063F   | GCTGTTTGGCGATAAGACGGC    | PCR/Sequencing ABCC2       |
| 3791Hz_ABCC2_96886R   | CAGCGACCTTAAAGTCTAAAGCCG | PCR/Sequencing ABCC2       |
| 3800Hz_ABCC2Ex2F      | TGGAAGGCATTACGAAAGGC     | PCR/Sequencing ABCC2       |
| 3801Hz_ABCC2Ex3R      | CGAAGAACAGGCAACCTTGACT   | PCR/Sequencing ABCC2       |
| 3802Hz_ABCC2Ex8F      | GAGCGGTCCGACATGCAAGT     | PCR/Sequencing ABCC2       |
| 3803Hz_ABCC2Ex8R      | GACCCACAGGACCAATGAT      | PCR/Sequencing ABCC2       |
| 3804Hz_ABCC2Ex13F     | GACCGACCAGCAATGATGCG     | PCR/Sequencing ABCC2       |
| 3805Hz_ABCC2Ex14R     | GGATCCACGCCTTCAGGTAA     | PCR/Sequencing ABCC2       |
| 3806Hz_ABCC2Ex19F     | GTGATTTGATCCCGGTGGGA     | PCR/Sequencing ABCC2       |
| 3807Hz_ABCC2Ex20R     | GCCATTCTTTGGTGGGTTA      | PCR/Sequencing ABCC2       |
| 3808Hz_ABCC2Ex23F     | CATCATGGACGAAGCTACCG     | PCR/Sequencing ABCC2       |
| 3809Hz_ABCC2Ex24R     | GCCTTAGCGACCTCCATTAAG    | PCR/Sequencing ABCC2       |
| 4032Hz_Scf_18_190197F | CTGAACACAAATGCGCAAATCG   | PCR/Sequencing off targets |
| 4033Hz_Scf_18_190612R | CGTGTTTACGACATGCCGAT     | PCR/Sequencing off target  |
| 4034Hz_Scf_18_204300F | ACGCGTTTAAATGAGTACAACCG  | PCR/Sequencing off target  |
| 4035Hz_Scf_18_204763R | ATGCAGTAGGTTAGGCGCCT     | PCR/Sequencing off target  |
| 4036Hz_Scf219_70159F  | TTATGACTTGTTGCCACAACC    | PCR/Sequencing off target  |
| 4037Hz_Scf219_70569R  | CGCCCTTATAGGTACGCCTT     | PCR/Sequencing off target  |
| 4038Hz_Scf86_289141F  | CAGGTCCTAAATATTTCATGCACC | PCR/Sequencing off target  |
| 4039Hz_Scf86_289549R  | CATGGCCTTTGTTTGTGGAT     | PCR/Sequencing off target  |

Table S2: : Functional domains predicted in the ATP binding cassette transporter subfamily C2 (ABCC2) protein of *Helicoverpa zea* predicted using online Simple Modular Architecture Research Tool (SMART: <http://smart.embl-heidelberg.de>, accessed on 16 August 2021)

| Name of the region     | Start | End  | Domain | E-Value  |
|------------------------|-------|------|--------|----------|
| Transmembrane region   | 96    | 113  | TMD1   | N/A      |
| Transmembrane region   | 139   | 156  | TMD1   | N/A      |
| Transmembrane region   | 212   | 234  | TMD1   | N/A      |
| Transmembrane region   | 238   | 260  | TMD1   | N/A      |
| Transmembrane region   | 336   | 358  | TMD1   | N/A      |
| Transmembrane region   | 363   | 382  | TMD1   | N/A      |
| AAA-Nucleotide Binding | 486   | 659  | NBD1   | 7.96e-11 |
| Transmembrane region   | 741   | 763  | TMD2   | N/A      |
| Transmembrane region   | 805   | 827  | TMD2   | N/A      |
| Transmembrane region   | 894   | 916  | TMD2   | N/A      |
| Transmembrane region   | 988   | 1010 | TMD2   | N/A      |
| Transmembrane region   | 1017  | 1039 | TMD2   | N/A      |
| AAA-Nucleotide Binding | 1111  | 1291 | NBD2   | 6.12e-12 |

Table S3. The number of eggs injected, percent larvae hatched, the number of males and females, and the total adults recovered from three rounds of embryo injections with sgRNA/Cas9 nucleoprotein complexes targeting ATP binding cassette transporter subfamily C2 (*ABCC2*) gene in *Helicoverpa zea*.

| Injection session | Total Eggs Injected | Total hatched | % Hatch | Males | Females | Dead larvae and pupae | % Adults (from injected eggs) |
|-------------------|---------------------|---------------|---------|-------|---------|-----------------------|-------------------------------|
| 1                 | 174                 | 74            | 42.5    | 30    | 31      | 13                    | 35.1                          |
| 2A                | 167                 | 37            | 22.2    | 15    | 14      | 8                     | 17.4                          |
| 2B                | 65                  | 12            | 18.5    | 4     | 5       | 3                     | 13.8                          |
| Total             | 406                 | 123           | 30.3    | 47    | 47      | 29                    | 23.2                          |
